# Supplementary material for: Study protocol for a randomised open-label clinical trial examining the safety and efficacy of the Android Artificial Pancreas System (AAPS) with advanced bolus-free features in adults with type 1 diabetes: the ‘CLOSE IT’ (Closed Loop Open SourcE In Type 1 diabetes) trial
Source: PubMed Central journal article supplement — BMJ Open. 2024 Feb 20;14(2):e078171. doi: 10.1136/bmjopen-2023-078171 (PMC10882371; doi:10.1136/bmjopen-2023-078171), 2024-02-20
Supplement: bmjopen-2023-078171.draft_revisions.pdf [file bmjopen-2023-078171.draft_revisions.pdf]

# BMJ Open

BMJ Open is committed to open peer review. As part of this commitment we make the peer review history of every article we publish publicly available.

When an article is published we post the peer reviewers' comments and the authors' responses online. We also post the versions of the paper that were used during peer review. These are the versions that the peer review comments apply to.

The versions of the paper that follow are the versions that were submitted during the peer review process. They are not the versions of record or the final published versions. They should not be cited or distributed as the published version of this manuscript.

BMJ Open is an open access journal and the full, final, typeset and author-corrected version of record of the manuscript is available on our site with no access controls, subscription charges or pay-per-view fees (<http://bmjopen.bmj.com>).

If you have any questions on BMJ Open's open peer review process please email [info.bmjopen@bmj.com](mailto:info.bmjopen@bmj.com)

# BMJ Open

**Study protocol for a randomised open label clinical trial examining the safety and efficacy of the Android Artificial Pancreas System (AAPS) with advanced bolus-free features in adults with type 1 diabetes: the 'CLOSE IT' (Closed Loop Open Source In Type 1 diabetes) trial**

|                               |                                                                                                                                                                                                                                                                                                                                                                                                                                                                                                                                                                                                                                                                                                                                             |
|-------------------------------|---------------------------------------------------------------------------------------------------------------------------------------------------------------------------------------------------------------------------------------------------------------------------------------------------------------------------------------------------------------------------------------------------------------------------------------------------------------------------------------------------------------------------------------------------------------------------------------------------------------------------------------------------------------------------------------------------------------------------------------------|
| Journal:                      | <i>BMJ Open</i>                                                                                                                                                                                                                                                                                                                                                                                                                                                                                                                                                                                                                                                                                                                             |
| Manuscript ID                 | bmjopen-2023-078171                                                                                                                                                                                                                                                                                                                                                                                                                                                                                                                                                                                                                                                                                                                         |
| Article Type:                 | Protocol                                                                                                                                                                                                                                                                                                                                                                                                                                                                                                                                                                                                                                                                                                                                    |
| Date Submitted by the Author: | 26-Jul-2023                                                                                                                                                                                                                                                                                                                                                                                                                                                                                                                                                                                                                                                                                                                                 |
| Complete List of Authors:     | Wilkinson, Tom; University of Otago Christchurch<br>Tomic, Dunya; Baker Heart and Diabetes Institute; Monash University, School of Public Health and Preventive Medicine<br>Boyle, Erin; Baker Heart and Diabetes Institute<br>Burren, David; Baker Heart and Diabetes Institute<br>Elghattis, Yasser; Baker Heart and Diabetes Institute<br>Jenkins, Alicia; Baker Heart and Diabetes Institute<br>Keesing, Celeste; University of Otago Christchurch<br>Middleton, Sonia; Baker Heart and Diabetes Institute<br>Nanayakkara, Natalie; Baker Heart and Diabetes Institute<br>Williman, Jonathan; University of Otago Christchurch<br>de Bock, Martin; University of Otago Christchurch<br>Cohen, Neale; Baker Heart and Diabetes Institute |
| Keywords:                     | DIABETES & ENDOCRINOLOGY, Clinical Trial, General diabetes < DIABETES & ENDOCRINOLOGY                                                                                                                                                                                                                                                                                                                                                                                                                                                                                                                                                                                                                                                       |
|                               |                                                                                                                                                                                                                                                                                                                                                                                                                                                                                                                                                                                                                                                                                                                                             |

SCHOLARONE™  
Manuscripts

1  
2  
3  
4 **Study protocol for a randomised open label clinical trial examining the safety and efficacy**  
5 **of the Android Artificial Pancreas System (AAPS) with advanced bolus-free features in**  
6 **adults with type 1 diabetes: the 'CLOSE IT' (Closed Loop Open SourcE In Type 1 diabetes)**  
7 **trial**  
8

9 Tom M Wilkinson<sup>1\*</sup>, Dunya Tomic<sup>2, 3\*</sup>, Erin Boyle<sup>2</sup>, David Burren<sup>2</sup>, Yasser Elghattis<sup>2</sup>, Alicia  
10 Jenkins<sup>2</sup>, Celeste Keesing<sup>1</sup>, Sonia Middleton<sup>2</sup>, Natalie Nanayakkara<sup>2</sup>, Jonathan Williman<sup>1</sup>,  
11 Martin de Bock<sup>1, 4^</sup>, Neale D Cohen<sup>2, 3, 5^</sup>  
12  
13

14 <sup>1</sup>University of Otago, Christchurch, New Zealand  
15

16 <sup>2</sup>Baker Heart and Diabetes Institute, Melbourne, Australia  
17

18 <sup>3</sup>School of Public Health and Preventive Medicine, Monash University, Melbourne, Australia  
19

20 <sup>4</sup>Te Whatu Ora Waitaha/Canterbury, Christchurch, New Zealand  
21

22 <sup>5</sup>The University of Queensland, Brisbane, Australia  
23

24 \*TMW and DT are joint first authors.  
25

26 ^NDC and MD are joint senior authors.  
27

28  
29  
30  
31 Corresponding author:

32 Tom Wilkinson

33 [Thomas.wilkinson@cdhb.health.nz](mailto:Thomas.wilkinson@cdhb.health.nz)

34 +64 27 353 6505

35 4 Oxford Terrace, Christchurch 8011, New Zealand

36 ORCID 0000-0002-9025-3778  
37  
38

39  
40 Keywords: Type 1 diabetes; closed loop; open-source; full automation  
41

42 Word count: 3930  
43  
44  
45  
46  
47  
48  
49  
50  
51  
52  
53  
54  
55  
56  
57  
58  
59  
60

## ABSTRACT

**Introduction:** Multiple automated insulin delivery (AID) systems have become commercially available following randomised controlled trials demonstrating benefit in people with type 1 diabetes (T1D). However, their real-world utility may be undermined by user-associated burdens, including the need to carbohydrate count and deliver manual insulin boluses. There is an important need for a “fully-automated closed loop” (FCL) AID system, without manual mealtime boluses. The (Closed Loop Open Source In Type 1 diabetes) CLOSE IT trial is a randomised trial comparing a FCL AID system to the same system used as hybrid closed loop (HCL) in people with T1D, in an outpatient setting over an extended timeframe.

**Methods and analysis:** Randomised, open-label, parallel, non-inferiority trial comparing the Android Artificial Pancreas System (AAPS) AID algorithm used as FCL to the same algorithm used as HCL. Seventy-five participants aged 18-70 will be randomised (1:1) to one of two treatment arms for 12 weeks: (a) FCL – participants will be advised not to bolus for meals; (b) HCL – participants will use the AAPS AID algorithm as HCL with announced meals. The primary outcome is the percentage of time in target sensor glucose range (3.9-10.0mmol/L) (TIR). Secondary outcomes include other glycaemic metrics, safety, psychosocial factors, platform performance, and user dietary factors. Twenty FCL arm participants will participate in a 4-week extension phase comparing glycaemic and dietary outcomes using NovoRapid® (insulin aspart) to Fiasp® (insulin aspart and niacinamide).

**Ethics and dissemination:** Approvals are by the Alfred Health Ethics Committee (615/22) (Australia) and Health and Disability Ethics Committees (2022 FULL 13832) (New Zealand). Each participant will provide written informed consent. Data protection and confidentiality will be ensured. Study results will be disseminated by publications, conferences and patient advocacy groups.

**Trial registration number:** ACTRN12622001400752p.

**ARTICLE SUMMARY****Strengths and limitations of this study**

- CLOSE IT is a direct comparison of an automated insulin delivery (AID) system used as full closed loop (FCL) to that same system used as hybrid closed loop (HCL), in people with T1D during prolonged (12 weeks) outpatient follow-up.
- A 12-week run-in phase aims to ensure all participants are established on AID with optimised skills and pump parameters pre-randomisation.
- Dietary records and qualitative interviews will explore changes in dietary intake and attitudes in FCL system users.
- This trial is unmasked, with participants in both arms having access to the same devices, therefore there is a risk of spuriously concluding non-inferiority due to participant non-adherence.
- The investigational AID system is open-source, therefore trial findings may not apply to people with T1D and diabetes healthcare providers who prefer a commercially available AID system.

## INTRODUCTION

Type 1 diabetes (T1D) is a chronic health condition with substantial self-management demands regarding lifestyle, diet, and insulin dosing. Despite technological advances including continuous glucose monitoring (CGM) and insulin pump therapy, most people with T1D do not attain glycaemic targets (1), exposing them to risk of acute and chronic complications. Automated insulin delivery (AID) systems, also termed closed loop or artificial pancreas systems combine insulin pump technology, CGM, and control algorithms, to automatically adjust insulin delivery based on interstitial fluid glucose sensor readings (2). Multiple AID systems have become commercially available following large randomised controlled trials demonstrating improved glycaemia in people with T1D when compared to sensor-augmented pump therapy (SAPT) (3-7). Participants in these trials delivered manual insulin boluses pre-meals and real-world users are advised to do the same, hence these systems are termed “hybrid closed loop” (HCL).

Despite clear glycaemic benefits, real-world utility of AID systems may be undermined by the burden associated with their use. Notably, reluctance to start AID, and AID discontinuation once started, have been reported as more prevalent in users with suboptimal baseline glycaemia (8, 9). Reducing inequity in diabetes outcomes therefore requires minimisation of perceived and actual burdens of AID use. The burden is multifactorial, including device-related factors (10) and difficulty trusting automated insulin dosing decisions (10-14). However, the need to deliver manual insulin boluses with carbohydrate counting is likely to be contributory in many users. Observational T1D studies have described frequent missed mealtime boluses in pump-users (15, 16), and inaccuracies in carbohydrate counting (17, 18). There is therefore an important need for an AID system which can be used as “fully-automated closed loop” (FCL), without manual mealtime boluses.

The oref1 “reference design” algorithm introduced in OpenAPS (open-source artificial pancreas system) is also used in Android Artificial Pancreas System (AAPS) installed as an application on an Android phone. These “do-it-yourself” AID systems were first shared as open-source software in 2015 (19). The CREATE trial (n=97) found that those with T1D using oref1 for 24 weeks in an outpatient setting had higher mean time in range (TIR; percentage of CGM recordings between 3.9-10.0 mmol/L) compared to those using SAPT (71.2 vs. 54.5%,  $p<0.001$ ) (20). Results broadly aligned with comparable trials of commercial AID systems (3-7). Furthermore, a pilot crossover trial comparing oref1 used as FCL to the same system used as HCL in adolescents with T1D during supervised 3-day periods found no significant difference in mean TIR (81 vs. 83%) (21). Further investigation is required to assess if these findings extrapolate to unselected patients in an unsupervised home environment.

Delayed insulin activity following subcutaneous injection is a barrier to attainment of glycaemic targets by any FCL system (22). Fiasp® is an ultra-rapid acting insulin preparation, containing insulin aspart and niacinamide. Compared to insulin aspart alone (NovoRapid®), subcutaneous injection of Fiasp® results in more rapid appearance of insulin in the intravascular space (23, 24). However, Fiasp® and NovoRapid® have only been directly

1  
2  
3 compared in AID users consuming meals without manual boluses in small short-term studies  
4 (25, 26).  
5

6  
7 The CLOSE IT trial assesses the efficacy of AAPS as FCL. The primary study objective is to  
8 evaluate TIR, comparing AAPS used as FCL to AAPS used as HCL during 12 weeks use.  
9 Secondary outcomes are the effectiveness of AAPS used as FCL relative to AAPS used as HCL  
10 with regards to glycaemic control and safety (27); psychosocial factors; platform  
11 performance; and user dietary factors. The CLOSE IT trial also includes a 4-week extension  
12 phase during which participants using FCL will change from NovoRapid® to Fiasp®, assessing  
13 changes in glycaemic metrics.  
14  
15

## 16 **METHODS AND ANALYSIS**

### 17 **Study design**

18  
19 The CLOSE IT trial is an open label, multi-site, randomised, parallel-group 12-week non-  
20 inferiority trial evaluating the effectiveness and safety of AAPS used as FCL compared to  
21 AAPS used as HCL in adults (aged 18-70 years) with T1D.  
22

23  
24 All participants will complete a 12-week run-in phase, during which they become familiar  
25 with Dexcom G6® CGM and the Ypsomed insulin pump and initiate AAPS, used as HCL (see  
26 figure 1). Participants will then be randomly allocated (1:1) to one of two treatment groups:  
27

- 28  
29
- 30 A. Fully-automated closed loop system: Participants will continue to use AAPS, however  
31 will be advised not to bolus for meals, and not to correct high glucose levels unless  
32 they become symptomatic or sensor glucose levels are >15.0 mmol/L for ≥1 hour.  
33
  - 34 B. Hybrid closed loop system: Participants will continue to use AAPS as a hybrid closed  
35 loop system with manual mealtime boluses informed by carbohydrate counting,  
36 unchanged from therapy established during the run-in phase.  
37
- 38  
39  
40

41 The RCT phase is 12 weeks duration, with the primary endpoint based on glycaemic data  
42 collected during the final 14 days.  
43

### 44 **Run-in phase**

45  
46 Following baseline assessments (Table 2), participants will be provided with an Ypsomed  
47 insulin pump, pump consumables, and unmasked Dexcom G6 CGM and trained in their use.  
48 Training will be customised for each individual to account for factors including prior  
49 familiarity with pump therapy and current glycaemia. NovoRapid® insulin will be exclusively  
50 used in the run-in and trial phases. A study dietitian will assess carbohydrate counting  
51 competency. Targeted education in carbohydrate counting will be provided if required.  
52  
53

54  
55 Participants will receive an Android phone containing a locked version of the oref1  
56 algorithm installed as an app ("Lotus"), effectively representing open-source AAPS. This  
57 system uses a heuristic algorithm that estimates a glycaemia projection every 5 minutes  
58 based on current glucose levels, insulin doses, announced carbohydrate consumption, and  
59  
60

1  
2  
3 user-specific parameters. When initially used, the system adjusts insulin dosing by  
4 modulating the basal rate. Users will subsequently activate “super micro boluses” (SMBs),  
5 which enable the system to deliver small, repeated boluses to correct high sensor glucose  
6 readings.  
7  
8

9 The run-in phase is 84 days, with day 1 defined as the day on which the study insulin pump  
10 is first used to deliver insulin to the participant. During this phase participants will  
11 commence HCL therapy using AAPS. Participants may either commence SAPT on day 1 and  
12 later transition to AID, or they may commence AID on day 1. AAPS settings will be  
13 optimised, including activation of SMBs. Participants will be supported through regular (at  
14 least weekly) electronic review of CGM data and pump settings by research staff. In-person  
15 study visits will be arranged as required.  
16  
17

18  
19 Timing of AID commencement and optimisation of AAPS settings will be individualised for  
20 each participant; however, the target is for all participants to be established on AAPS with  
21 settings adjusted as best possible to optimise glycaemic control by day 70.  
22  
23

### 24 **Trial phase**

25  
26 The trial phase is 84 days, representing days 85-168 of the trial. Participants will be  
27 informed of their allocated treatment group. Those allocated to HCL will continue to use  
28 AAPS in a similar manner to the run-in phase. Those allocated to FCL will be asked to  
29 discontinue any meal announcement and only give a manual bolus if specified criteria are  
30 met (sensor-detected glucose >15.0 mmol/L for ≥1 hour, or symptomatic hyperglycaemia).  
31  
32

33  
34 As in the run-in phase, participants will be supported through regular (at least weekly)  
35 electronic review of CGM data and pump settings by research staff and in-person study  
36 visits as required. Documentation of all reviews will be maintained to demonstrate that  
37 participants in both groups have equal access to clinical support.  
38  
39

### 40 **Extension phase**

41  
42 Participants allocated to FCL will, at completion of the trial phase, be sequentially invited to  
43 participate in the 28-day extension phase representing days 169-196 of the trial.  
44 Participants will change the insulin used in the study pump from NovoRapid® (insulin aspart)  
45 to Fiasp® (insulin aspart and niacinamide), while continuing to use AAPS as FCL under the  
46 same conditions as the trial phase. Participants will continue to be supported through  
47 regular (at least weekly) electronic review of CGM data and pump settings by research staff,  
48 and in-person study visits as required.  
49  
50

### 51 **Patient involvement**

52  
53 People with T1D were involved in protocol design. AAPS, as an open-source system, has  
54 been developed and refined by people living with T1D. Individuals with T1D will also  
55 contribute to trial conduct and to reporting and dissemination of trial results.  
56  
57

### 58 **Recruitment**



1  
2  
3  
4 The trial will enrol adults aged 18-70 with T1D at two sites: University of Otago, Christchurch  
5 (New Zealand) and the Baker Heart and Diabetes Institute, Melbourne (Australia).  
6 Recruitment commenced in April 2023 and is anticipated to be completed in 2024.  
7  
8

9 Study candidates will be identified by local clinicians. Formal recruitment will occur by  
10 research staff outside of routine clinical care, ensuring participants can provide informed  
11 consent free from undue influence. Evaluation of eligibility will be performed at screening  
12 according to inclusion and exclusion criteria (Table 1). To include a broad range of  
13 participants, these criteria allow for participants to be using either multiple daily insulin  
14 injections or insulin pump therapy at baseline, with no eligibility restrictions based on  
15 glycaemic metrics.  
16  
17

### 18 19 **Sample size**

20  
21 The CLOSE IT trial has a non-inferiority design. Based on a mean TIR of 70% (SD 10%)  
22 approximating that seen in the HCL arm of the CREATE trial (20) and similarly designed trials  
23 of commercial HCL systems (3-7), and a largest clinically acceptable difference of 7% TIR, 70  
24 participants (35 in each group) are required to provide 90% power at  $\alpha=0.05$ . An overall  
25 sample size of 75 participants allows for five dropouts.  
26  
27

28  
29 The pre-specified non-inferiority margin of 7% difference in TIR is larger than the 3%  
30 difference in TIR recommended in the 2023 international consensus statement on CGM  
31 metrics in clinical trials (27), which was published after development of this protocol. This  
32 does not preclude a finding of non-inferiority at a 3% margin. A secondary outcome is the  
33 proportion of participants in each trial arm for whom TIR does not decrease by >5%,  
34 consistent with the international consensus on a significant change in TIR for an individual.  
35  
36

37 A sample size of 20 participants in the extension phase will provide 80% power at two-sided  
38  $\alpha=0.05$  to detect a mean within-person absolute change of 5%, assuming a within-person  
39 standard deviation of 7.5%.  
40  
41

### 42 **Screening and enrolment**

43  
44 Individuals deemed a study candidate at pre-screening will be given the opportunity to  
45 review the participant information and consent form (PICF). Processes of obtaining  
46 informed consent will include the requirements of ISO 14155:2011 and Good Clinical  
47 Practice. All participants must sign and date the current ethics approved written informed  
48 consent form before any study specific assessments or procedures are performed.  
49 Additional consent will be sought for participation in interviews during the study as  
50 appropriate.  
51  
52

53  
54 Table 2 delineates the baseline information which will be gathered post-consent, screening  
55 eligibility confirmation and enrolment in the study. Participants who do not usually use a  
56 Dexcom G6<sup>®</sup> CGM will be required to complete 14 days blinded CGM, with >75% sensor  
57 data capture. Participants who normally use a Dexcom G6<sup>®</sup> and who can provide CGM data  
58 from the preceding 14 days, will not be required to complete blinded CGM monitoring.  
59  
60

## Randomisation

Participants will be randomly allocated (1:1) to receive FCL or HCL therapy. A computer-generated randomisation list, with permuted blocks of random size, will be pre-prepared by the study statistician, who will not be involved in participant enrolment or treatment allocation. The randomisation list will be concealed and loaded into the Research Electronic Data Capture (REDCap) database on Baker Institute servers.

Participants may only be randomised on day 85, following completion of the run-in phase. Then, research staff with authorisation to randomise participants may click the “randomise” button within REDCap which will assign the treatment to the study number and lock the fields containing the treatment group. This process will ensure allocation is concealed from research staff and participants until after run-in phase completion.

## Primary outcome measures

The primary outcome is the percentage of time spent in target sensor glucose range (3.9-10.0 mmol/L) during the last 14 days of the trial phase, comparing FCL to HCL. Timing of all assessments is in Table 3.

## Secondary outcome measures

### *Glycaemic control*

HbA1c will be measured using a DCCT-aligned assay in local laboratories in venous blood from baseline and completion of the run-in and trial phases.

Individual CGM data will be pushed from the Android phone into a cloud-based server; Nightscout (described under Data Management). CGM data will be analysed according to standardised CGM metrics for clinical trials (27).

- Percentage of participants able to maintain TIR >70%
- Percentage of participants for whom TIR decreases by >5% between days 71-84 and days 155-168
- Time in tight range, defined as % CGM time 3.9-7.8 mmol/L
- % CGM time < 3.9 mmol/L
- % CGM time < 3.0 mmol/L
- % CGM time > 10.0 mmol/L
- % CGM time > 13.9 mmol/L
- Mean sensor glucose and glucose variability (expressed primarily as coefficient of variation and secondly as a standard deviation)
- Glycaemic outcomes differentiated as 24-hours, day (0600-2359 hours) and night (0000-0559 hours)

*Insulin delivery systems: perceptions, ideas, reflections, and expectations (INSPIRE)*

INSPIRE is a standardised tool with questions specific to AID systems, with demonstrated reliability of individual items on initial validation in a cohort of people with T1D (28). Participants will complete the 22-item adult baseline questionnaire during the study baseline assessment. Participants will complete the 22-item adult post-intervention questionnaire twice: at the end of the run-in phase (recognising that they will have used AID for most of this phase) and at the end of the trial phase.

#### *Health status (EuroQol 5-dimensional questionnaire 5-level; EQ-5D-5L)*

EQ-5D-5L is a generic patient-reported outcome questionnaire, with demonstrated validity and reliability in many disease areas (29). Although it does not provide information specific to AID use in T1D, as a widely used measure it can inform health economic analyses. EQ-5D-5L assesses overall health re: mobility, self-care, usual activities, pain/discomfort, and anxiety/depression. Participants rate their health on a given day on each dimension with five levels of severity and give a global rating of their health overall on a 0-100 scale. Participants will complete the questionnaire three times: baseline, end of run-in, and end of trial phase.

#### *System usability scale (SUS)*

SUS, a validated global tool suited to consumer products to assess the user experience (30), comprises a 10-item questionnaire. Responses generate a score from 0-100, with a higher score representing greater user-friendliness. Participants will complete the questionnaire once, at the end of the trial phase.

#### *Platform performance*

Insulin delivery data will also be pushed from the Android phone into Nightscout and used to analyse platform performance and to verify participant adherence to their allocated treatment group (FCL or HCL).

- Percentage time using AID.
- Frequency of manual insulin boluses, further categorised in the FCL arm as boluses delivered in accordance with protocol and boluses delivered outside of protocol.
- Total insulin dose delivered by manual boluses, expressed as a percentage of overall total insulin dose, further categorised in the fully-automated arm as boluses delivered in accordance with protocol and boluses delivered outside of protocol.

#### *User dietary factors*

Participants will complete a 3-day diet record at study enrolment, between days 71-84 (run-in phase), between days 155-168 (trial phase), and between days 183-196 (extension phase). Diet records will be completed in the Easy Diet Diary app (Xyris Software Ltd, Australia) on the participant's phone, with assistance provided as required by a study dietitian. Participants will record all food, drinks, and times consumed in the app by searching the food database, scanning barcodes, and taking photos.

### *Qualitative interviews*

Up to 15 FCL group participants will be invited to a qualitative interview at completion of the trial phase, exploring their experiences. Verbatim transcripts will undergo descriptive qualitative thematic analysis.

### **Tertiary outcome measures**

#### *Biobanking*

Venous blood (plasma, serum and cell pellet) from participants in Australia will be stored (-80°C) for future testing at each time that HbA1c is tested. Analyses will relate to glycaemia (1,5 anhydroglucitol, glycated albumin), inflammation (CRP by high-sensitivity assay, vascular cell adhesion molecules), oxidative stress (myeloperoxidase, mitochondrial DNA copy number), and chronic complications (microRNAs).

#### **Masking**

Masking of participants and trialists is not possible due to the nature of the intervention, requiring participants to actively change the way in which they use the study devices.

#### **Data analysis**

A statistical analysis plan will be prepared by the study statistician and approved by principal investigators pre-analyses. Analysis will commence after the last participant has completed the RCT phase and will use an up-to-date version of R, SAS, or Stata statistical software. CGM data, captured at 5-minute intervals throughout the study, will be used to calculate the primary endpoint (TIR) by dividing the number of CGM measures within the target glucose range (3.9 to 10.0 mmol/L) by the total number of CGM measures recorded. This primary, and all secondary CGM metrics, will be calculated for all participants during the last 14 days of the run-in phase (days 71-84) and the last 14 days of the RCT phase (days 155-168). Study outcomes will be descriptively summarised by study phase and treatment group.

The primary endpoint, and all continuous secondary CGM endpoints, will be compared between treatment groups during the last 14 days of the RCT phase using constrained longitudinal data analysis. This model adjusts for baseline levels by forcing treatment groups to share a common mean value. Study site will be included as a fixed effect, but no other variables will be adjusted for. This model will be used to estimate the intervention effect (between group difference) with 95% CI. Other continuous secondary endpoints, collected during clinic visits at the start and end of the RCT phase (e.g. HbA1c and psychosocial factors), will be analysed in an identical manner.

It is recognised that in non-inferiority trials, both intention-to-treat and per protocol analyses risk biases that favour finding non-inferiority; intention-to-treat analysis may suffer due to treatment non-adherence, and per protocol analysis due to confounding (31). The

1  
2  
3 primary analysis will be performed on the intent-to-treat population, and a per protocol  
4 analysis will also be performed and results considered when determining non-inferiority. For  
5 the per protocol analysis CGM metrics will be considered to belong to the FCL group on days  
6 where the participant has delivered no manual boluses outside of protocol conditions, or to  
7 the HCL group on days where the participant has delivered  $\geq 2$  manual boluses outside of  
8 protocol conditions. Thus, a single participant may belong to different treatment groups on  
9 different days.  
10  
11

### 12 13 **Extension study outcome measures and analysis**

14  
15 The extension study primary endpoint is TIR between days 183-196, calculated in a similar  
16 manner as above and compared to TIR during the last 14 days of the trial phase (days 155-  
17 168). The change in TIR after having changed from NovoRapid® to Fiasp® insulin will be  
18 calculated for each individual, and summarised for all 20 participants as mean and standard  
19 deviation with 95% CI. A paired t-test will be used to determine if the observed change is  
20 consistent with the null hypothesis of no change, with a two-sided  $p < 0.05$  used to  
21 determine statistical significance. Secondary metrics will be tested similarly, with the  
22 Benjamini and Hochberg method used to control false discovery rates associated with  
23 multiplicity of testing.  
24  
25  
26

### 27 28 **Data management**

29  
30 Data flow and management will occur through Nightscout, an open-source remote  
31 monitoring tool. Individual data will be pushed from the Android phone into Nightscout.  
32 Raw data, including all pump data at  $\approx 5$ -minute intervals, will be uploaded de-identified to  
33 Nightscout. These data will then be downloaded onto secure servers at the Baker Institute  
34 and University of Otago. Nightscout accounts are de-identified to protect privacy and will  
35 only hold insulin pump and CGM data.  
36  
37

38  
39 Qualitative interviews will be transcribed using Otter, an online artificial intelligence  
40 transcription service (Los Altos, USA). Interview content will be stored on an Otter-hosted  
41 online server, security of which is maintained by Otter and includes two-factor  
42 authentication to access participant data. Interviews will not collect personal identifying  
43 data (e.g. name, address, employment information, health records, or financial  
44 information).  
45  
46

47  
48 All other de-identified data, including demographic, auxological, clinical, diabetic, lifestyle  
49 and psychosocial questionnaires and AEs will be electronically stored on REDCap in secure  
50 Baker Institute servers. REDCap is a web-based application which supports data capture for  
51 research studies, providing validated data entry and audit trails for tracking data  
52 manipulation and export procedures, and custom modules for participant randomisation  
53 and scheduling data collection events.  
54  
55

56  
57 Records containing identifying details of New Zealand-based participants will be securely  
58 stored at the University of Otago and accessed only by New Zealand study staff. Records  
59 containing identifying details of Australia-based participants will be securely stored at the  
60 Baker Institute. These records will be retained for at least 15 years.

1  
2  
3 SPIRIT reporting guidelines for a protocol of a clinical trial (32) have been used.  
4  
5

## 6 **ETHICS AND DISSEMINATION**

7

8 The trial is registered with the Australian New Zealand Clinical Trials Registry  
9 (ACTRN12622001400752p) and has been approved by the Alfred Health Ethics Committee  
10 (615/22) Australia and New Zealand Health and Disability Ethics Committees (2022 FULL  
11 13832). Investigators will ensure the study conducted is in full conformance with the  
12 requirements of ISO 14155: 2011, the principles of the “Declaration of Helsinki” and with  
13 the laws and regulations of Australia and New Zealand. It is the responsibility of the  
14 investigator, or their designee to obtain signed and dated informed consent from each  
15 participant prior to study participation and after adequate explanation of the aims,  
16 methods, objectives, and potential hazards of the study and opportunity to ask questions  
17 and consider answers. If a participant is unable to give informed consent then the principal  
18 investigator will assess if the participant meets eligibility criteria. Any subject who cannot  
19 read or write English will be excluded as they would not be able to comply with study  
20 requirements. During the informed consent process, participants will be given the option to  
21 opt-in or opt-out of the extension phase, qualitative interview, and biobanking components  
22 of the trial.  
23  
24  
25  
26

27 At trial-end participants will return to their usual Healthcare Professional team. New  
28 Zealand-based participants will be eligible to apply for compensation from the New Zealand  
29 Accident Compensation Corporation (ACC) in the event of a study related injury or illness. In  
30 the very unlikely event that ACC declines cover, then the University of Otago’s clinical trial  
31 insurance would apply. For Australia-based participants, the Baker Institute’s clinical trial  
32 insurance will apply in event of study-related injury or illness.  
33  
34  
35

36 Any of the following adverse events (AE) will be documented in a timely manner:  
37  
38

- 39 1. Adverse Device Effects (ADE): adverse events resulting from insufficient or  
40 inadequate instructions for use, deployment, implantation, installation, or operation,  
41 or any malfunction of the investigational medical device, and any event resulting  
42 from use error from intentional misuse of the investigational device.
- 43 2. Serious Adverse Events (SAE): adverse events resulting in death, life-threatening  
44 illness or injury, causing permanent impairment of body structure or function,  
45 requiring hospitalisation, or medical or surgical intervention to prevent any of the  
46 aforementioned SAEs.
- 47 3. Device Deficiencies (DD): any inadequacy of a medical device with respect to its  
48 identity, quality, durability, reliability, safety, or performance.  
49  
50  
51  
52

53 An electronic clinical record form (eCRF) will record:  
54

- 55 • Start and stop date of the event
- 56 • A description of the event, including associated symptoms
- 57 • Assessment of seriousness
- 58 • Assessment of intensity  
59  
60

- Assessment of relationship to the investigational device
- Intervention/troubleshooting
- Outcome

All reportable AE will be followed up, if possible, until return to baseline status or stability, and if this is not achieved an explanation will be recorded in the eCRF. An independent Data Monitoring Committee (DMC) will assess accumulated data to ensure trial integrity and safety.

Dissemination of study results will be via rigorous peer-reviewed publications, conferences and patient advocacy groups. Investigators envisage trial results can deliver real-world health benefit for the global T1D community. The study is designed to maximise publishable outputs, including the first RCT outcome data for a fully-automated closed loop system in an outpatient setting. To deliver real-world impact investigators will leverage their representation on local and international diabetes advisory groups, and advocate approval of the open-source algorithm by relevant health regulators.

#### **AUTHOR CONTRIBUTIONS**

TMW and DT wrote the manuscript. All authors reviewed the manuscript. TMW, EB, DB, YE, JW, MdB, AJJ and NDC wrote the original study protocol. CK and SM advised regarding conduct of dietary aspects of the protocol.

#### **FUNDING STATEMENT**

The trial is being funded by a grant from the JDRF non-profit diabetes research fund.

#### **COMPETING INTERESTS STATEMENT**

TMW, DT, EB, YE, NN have nothing to disclose.

MdB declares receiving speaker fees from Medtronic, Dexcom, Boehringer Ingelheim, research support from Dexcom, Medtronic, Novonordisk, Pfizer, SOOIL, and has served as advisory board membership for Dexcom. NDC declares speaker fees from Novo Nordisk, Lilly, Boehringer Ingelheim, Abbott and research support from Ypsomed, Novo Nordisk, Boehringer Ingelheim, Astra Zeneca, Novartis. JW declares research support from Dexcom and SOOIL. DB declares employment at Nascence Biomed (which provides the technical platform for the CLOSE IT trial) and serving on an editorial board for Ascensia.

#### **REFERENCES**

1. Mair C, Wulaningsih W, Jeyam A, McGurnaghan S, Blackburn L, Kennon B, et al. Glycaemic control trends in people with type 1 diabetes in Scotland 2004–2016. *Diabetologia*. 2019;62(8):1375-84.
2. Renard E. Automated insulin delivery systems: from early research to routine care of type 1 diabetes. *Acta Diabetol*. 2023;60(2):151-61.
3. Brown SA, Kovatchev BP, Raghinaru D, Lum JW, Buckingham BA, Kudva YC, et al. Six-Month Randomized, Multicenter Trial of Closed-Loop Control in Type 1 Diabetes. *New England Journal of Medicine*. 2019;381(18):1707-17.
4. Tauschmann M, Thabit H, Bally L, Allen JM, Hartnell S, Wilinska ME, et al. Closed-loop insulin delivery in suboptimally controlled type 1 diabetes: a multicentre, 12-week randomised trial. *Lancet*. 2018;392(10155):1321-9.

- 1  
2  
3 5. Collins OJ, Meier RA, Betts ZL, Chan DSH, Frampton C, Frewen CM, et al. Improved Glycemic Outcomes With Medtronic MiniMed Advanced Hybrid Closed-Loop Delivery: Results From a Randomized Crossover Trial Comparing Automated Insulin Delivery With Predictive Low Glucose Suspend in People With Type 1 Diabetes. *Diabetes Care*. 2021;44(4):969-75.
- 9 6. Benhamou PY, Franc S, Reznik Y, Thivolet C, Schaepelynck P, Renard E, et al. Closed-loop insulin delivery in adults with type 1 diabetes in real-life conditions: a 12-week multicentre, open-label randomised controlled crossover trial. *Lancet Digit Health*. 2019;1(1):e17-e25.
- 14 7. Haidar A, Legault L, Raffray M, Gouchie-Provencher N, Jacobs PG, El-Fathi A, et al. Comparison Between Closed-Loop Insulin Delivery System (the Artificial Pancreas) and Sensor-Augmented Pump Therapy: A Randomized-Controlled Crossover Trial. *Diabetes Technol Ther*. 2021;23(3):168-74.
- 19 8. Messer LH, Berget C, Vigers T, Pyle L, Geno C, Wadwa RP, et al. Real world hybrid closed-loop discontinuation: Predictors and perceptions of youth discontinuing the 670G system in the first 6 months. *Pediatr Diabetes*. 2020;21(2):319-27.
- 23 9. Telo GH, Volkening LK, Butler DA, Laffel LM. Salient characteristics of youth with type 1 diabetes initiating continuous glucose monitoring. *Diabetes Technol Ther*. 2015;17(6):373-8.
- 27 10. Naranjo D, Suttiratana SC, Iturralde E, Barnard KD, Weissberg-Benchell J, Laffel L, et al. What End Users and Stakeholders Want From Automated Insulin Delivery Systems. *Diabetes Care*. 2017;40(11):1453-61.
- 31 11. van Bon AC, Kohinor MJ, Hoekstra JB, von Basum G, deVries JH. Patients' perception and future acceptance of an artificial pancreas. *J Diabetes Sci Technol*. 2010;4(3):596-602.
- 33 12. Quintal A, Messier V, Rabasa-Lhoret R, Racine E. A Qualitative Study of the Views of Individuals With Type 1 Diabetes on the Ethical Considerations Raised by the Artificial Pancreas. *Narrat Inq Bioeth*. 2020;10(3):237-61.
- 37 13. Taleb N, Quintal A, Rakheja R, Messier V, Legault L, Racine E, et al. Perceptions and expectations of adults with type 1 diabetes for the use of artificial pancreas systems with and without glucagon addition: Results of an online survey. *Nutr Metab Cardiovasc Dis*. 2021;31(2):658-65.
- 41 14. Tanenbaum ML, Iturralde E, Hanes SJ, Suttiratana SC, Ambrosino JM, Ly TT, et al. Trust in hybrid closed loop among people with diabetes: Perspectives of experienced system users. *J Health Psychol*. 2020;25(4):429-38.
- 45 15. Olinder AL, Kernell A, Smide B. Missed bolus doses: devastating for metabolic control in CSII-treated adolescents with type 1 diabetes. *Pediatr Diabetes*. 2009;10(2):142-8.
- 49 16. Akturk HK, Snell-Bergeon J, Shah VN. Efficacy and Safety of Tandem Control IQ Without User-Initiated Boluses in Adults with Uncontrolled Type 1 Diabetes. *Diabetes Technol Ther*. 2022;24(10):779-83.
- 53 17. Meade LT, Rushton WE. Accuracy of carbohydrate counting in adults. *Clinical Diabetes: A Publication of the American Diabetes Association*. 2016;34(3):142.
- 55 18. Brazeau AS, Mircescu H, Desjardins K, Leroux C, Strychar I, Ekoe JM, et al. Carbohydrate counting accuracy and blood glucose variability in adults with type 1 diabetes. *Diabetes Res Clin Pract*. 2013;99(1):19-23.
- 59 19. Lewis D. History and Perspective on DIY Closed Looping. *J Diabetes Sci Technol*. 2019;13(4):790-3.



- 1
  - 2
  - 3
  - 4
  - 5
  - 6
  - 7
  - 8
  - 9
  - 10
  - 11
  - 12
  - 13
  - 14
  - 15
  - 16
  - 17
  - 18
  - 19
  - 20
  - 21
  - 22
  - 23
  - 24
  - 25
  - 26
  - 27
  - 28
  - 29
  - 30
  - 31
  - 32
  - 33
  - 34
  - 35
  - 36
  - 37
  - 38
  - 39
  - 40
  - 41
  - 42
  - 43
  - 44
  - 45
  - 46
  - 47
  - 48
  - 49
  - 50
  - 51
  - 52
  - 53
  - 54
  - 55
  - 56
  - 57
  - 58
  - 59
  - 60
20. Burnside MJ, Lewis DM, Crocket HR, Meier RA, Williman JA, Sanders OJ, et al. Open-Source Automated Insulin Delivery in Type 1 Diabetes. *N Engl J Med*. 2022;387(10):869-81.
21. Petruzelkova L, Neuman V, Plachy L, Kozak M, Obermannova B, Kolouskova S, et al. First Use of Open-Source Automated Insulin Delivery AndroidAPS in Full Closed-Loop Scenario: Pancreas4ALL Randomized Pilot Study. *Diabetes Technol Ther*. 2023;25(5):315-23.
22. Weinzimer SA, Steil GM, Swan KL, Dziura J, Kurtz N, Tamborlane WV. Fully automated closed-loop insulin delivery versus semiautomated hybrid control in pediatric patients with type 1 diabetes using an artificial pancreas. *Diabetes Care*. 2008;31(5):934-9.
23. Heise T, Hovelmann U, Brondsted L, Adrian CL, Nosek L, Haahr H. Faster-acting insulin aspart: earlier onset of appearance and greater early pharmacokinetic and pharmacodynamic effects than insulin aspart. *Diabetes Obesity & Metabolism*. 2015;17(7):682-8.
24. Heise T, Zijlstra E, Nosek L, Rikte T, Haahr H. Pharmacological properties of faster-acting insulin aspart vs insulin aspart in patients with type 1 diabetes receiving continuous subcutaneous insulin infusion: A randomized, double-blind, crossover trial. *Diabetes Obes Metab*. 2017;19(2):208-15.
25. Lee MH, Paldus B, Vogrin S, Morrison D, Zaharieva DP, Lu J, et al. Fast-Acting Insulin Aspart Versus Insulin Aspart Using a Second-Generation Hybrid Closed-Loop System in Adults With Type 1 Diabetes: A Randomized, Open-Label, Crossover Trial. *Diabetes Care*. 2021;44(10):2371-8.
26. Dovic K, Piona C, Yesiltepe Mutlu G, Bratina N, Jenko Bizjan B, Lepej D, et al. Faster Compared With Standard Insulin Aspart During Day-and-Night Fully Closed-Loop Insulin Therapy in Type 1 Diabetes: A Double-Blind Randomized Crossover Trial. *Diabetes Care*. 2020;43(1):29-36.
27. Battelino T, Alexander CM, Amiel SA, Arreaza-Rubin G, Beck RW, Bergenstal RM, et al. Continuous glucose monitoring and metrics for clinical trials: an international consensus statement. *Lancet Diabetes Endocrinol*. 2023;11(1):42-57.
28. Weissberg-Benchell J, Shapiro JB, Hood K, Laffel LM, Naranjo D, Miller K, et al. Assessing patient-reported outcomes for automated insulin delivery systems: the psychometric properties of the INSPIRE measures. *Diabet Med*. 2019;36(5):644-52.
29. Devlin NJ, Shah KK, Feng Y, Mulhern B, van Hout B. Valuing health-related quality of life: An EQ-5D-5L value set for England. *Health Econ*. 2018;27(1):7-22.
30. Bangor A, Kortum PT, Miller JT. An empirical evaluation of the System Usability Scale. *Int J Hum-Comput Int*. 2008;24(6):574-94.
31. Mo Y, Lim C, Watson JA, White NJ, Cooper BS. Non-adherence in non-inferiority trials: pitfalls and recommendations. *BMJ*. 2020;370:m2215.
32. Chan AW, Tetzlaff JM, Gotzsche PC, Altman DG, Mann H, Berlin JA, et al. SPIRIT 2013 explanation and elaboration: guidance for protocols of clinical trials. *BMJ*. 2013;346:e7586.

1  
2  
3  
4  
5  
6  
7  
8  
9  
10  
11  
12  
13  
14  
15  
16  
17  
18  
19  
20  
21  
22  
23  
24  
25  
26  
27  
28  
29  
30  
31  
32  
33  
34  
35  
36  
37  
38  
39  
40  
41  
42  
43  
44  
45  
46  
47  
48  
49  
50  
51  
52  
53  
54  
55  
56  
57  
58  
59  
60

For peer review only

**TABLES**

**Table 1: Inclusion and exclusion criteria for participation in “CLOSE IT”**

| Inclusion criteria                                                                                                                                                                                                                                                              | Exclusion criteria                                                                                                                                                                                                                                                                                                                                                                                                                                                                                                                                                                                                                                                                                                                                                                                                                                                                                          |
|---------------------------------------------------------------------------------------------------------------------------------------------------------------------------------------------------------------------------------------------------------------------------------|-------------------------------------------------------------------------------------------------------------------------------------------------------------------------------------------------------------------------------------------------------------------------------------------------------------------------------------------------------------------------------------------------------------------------------------------------------------------------------------------------------------------------------------------------------------------------------------------------------------------------------------------------------------------------------------------------------------------------------------------------------------------------------------------------------------------------------------------------------------------------------------------------------------|
| <ul style="list-style-type: none"> <li>• Type 1 diabetes as per the American Diabetes Association classification for &gt;12 months prior to the screening visit.</li> <li>• Aged 18-70 years inclusive.</li> <li>• Willing and able to adhere to the study protocol.</li> </ul> | <ul style="list-style-type: none"> <li>• If female, is pregnant or plans to become pregnant while participating in the study. A positive pregnancy test at screening is exclusionary.</li> <li>• Use of non-insulin glucose lowering therapy within 3 months of study commencement.</li> <li>• Severe renal impairment (eGFR &lt;30mL/min/1.73m<sup>2</sup>).</li> <li>• Any documented active or suspected malignancy, except appropriately treated basal cell or squamous cell carcinoma of the skin or any “in situ” carcinoma.</li> <li>• Acute cardiovascular event (myocardial infarction, unstable angina, stroke) in the 3 months prior to study commencement.</li> <li>• Severe hypoglycaemia<sup>a</sup> or diabetic ketoacidosis in the 3 months prior to study commencement.</li> <li>• Consumption of a very low carbohydrate diet, defined as carbohydrate intake &lt;40g per day.</li> </ul> |

|  |                                                                                                                                                                                                                                                                                                                                                                                                                                    |
|--|------------------------------------------------------------------------------------------------------------------------------------------------------------------------------------------------------------------------------------------------------------------------------------------------------------------------------------------------------------------------------------------------------------------------------------|
|  | <ul style="list-style-type: none"> <li>• Inability to use insulin pump and/or mobile phone.</li> <li>• Any comorbid medical or psychological factors that would, on assessment by the investigators, make the person unsuitable for the study.</li> <li>• A lack of English literacy that would, on assessment by the investigators, make the person unsuitable for the study.</li> <li>• Allergy to insulin NovoRapid®</li> </ul> |
|--|------------------------------------------------------------------------------------------------------------------------------------------------------------------------------------------------------------------------------------------------------------------------------------------------------------------------------------------------------------------------------------------------------------------------------------|

<sup>a</sup>Defined as coma or convulsion requiring assistance from others.

**Table 2: Baseline assessments**

|                    |                                                                                                                                                                                                                          |
|--------------------|--------------------------------------------------------------------------------------------------------------------------------------------------------------------------------------------------------------------------|
| <b>Demographic</b> | <ul style="list-style-type: none"> <li>• Ethnicity</li> <li>• Gender</li> <li>• Highest level of education attained</li> </ul>                                                                                           |
| <b>Auxological</b> | <ul style="list-style-type: none"> <li>• Height</li> <li>• Weight</li> <li>• Body mass index</li> </ul>                                                                                                                  |
| <b>Diabetic</b>    | <ul style="list-style-type: none"> <li>• Prior or current use of CGM or flash glucose monitoring (&gt;75% use)</li> <li>• Number of episodes of severe hypoglycaemia in the 12 months prior to baseline visit</li> </ul> |

|                     |                                                                                                                                                                                                                                                                                                                                                                                                                  |
|---------------------|------------------------------------------------------------------------------------------------------------------------------------------------------------------------------------------------------------------------------------------------------------------------------------------------------------------------------------------------------------------------------------------------------------------|
|                     | <ul style="list-style-type: none"> <li>• Number of episodes of diabetic ketoacidosis in the 12 months prior to baseline visit</li> <li>• Mean total daily dose (TDD) of insulin over the previous 14 days</li> <li>• Mode of insulin delivery (i.e. multiple daily injections or insulin pump)</li> <li>• Clinical examination for lipohypertrophy that may impair absorption of subcutaneous insulin</li> </ul> |
| <b>Laboratory</b>   | <ul style="list-style-type: none"> <li>• Venous blood sample obtained for HbA1c, full blood count, and serum creatinine</li> </ul>                                                                                                                                                                                                                                                                               |
| <b>Clinical</b>     | <ul style="list-style-type: none"> <li>• Known allergies</li> <li>• Concomitant medications</li> <li>• Adverse event check</li> </ul>                                                                                                                                                                                                                                                                            |
| <b>Diet</b>         | <ul style="list-style-type: none"> <li>• Assessment of current carbohydrate intake, recorded over a three-day period</li> </ul>                                                                                                                                                                                                                                                                                  |
| <b>Psychosocial</b> | <ul style="list-style-type: none"> <li>• EuroQol 5-dimensional Questionnaire 5-Level (EQ-5D-5L)</li> <li>• Insulin Dosing Systems: Perceptions, Ideas, Reflections, and Expectations (INSPIRE) (pre-intervention questionnaire)</li> </ul>                                                                                                                                                                       |
| <b>Blinded CGM</b>  | <ul style="list-style-type: none"> <li>• 14 days use of blinded Dexcom G6</li> </ul>                                                                                                                                                                                                                                                                                                                             |

CGM = continuous glucose monitoring.

**Table 3: Schedule of assessments**

|                                                                       | Screening, consent, and baseline | Day -14 | Staged run-in phase (day 1-84)<br>Establishment of hybrid AID with AAPS using SMBs | RCT phase (day 85-168)<br>Group A: fully-automated AID with AAPS using SMBs<br>Group B: hybrid AID with AAPS using SMBs |            |            | Extension study (n = 20) (day 169-196)<br>Fully-automated AID with ultra-fast insulin |            |
|-----------------------------------------------------------------------|----------------------------------|---------|------------------------------------------------------------------------------------|-------------------------------------------------------------------------------------------------------------------------|------------|------------|---------------------------------------------------------------------------------------|------------|
|                                                                       |                                  |         | Day 1-84                                                                           | Day 85 ±4                                                                                                               | Day 85-168 | Day 168 ±4 |                                                                                       | Day 196 ±4 |
| Screening and informed consent                                        | X                                |         |                                                                                    |                                                                                                                         |            |            |                                                                                       |            |
| Demographics <sup>a</sup>                                             | X                                |         |                                                                                    |                                                                                                                         |            |            |                                                                                       |            |
| Clinical assessment <sup>b</sup>                                      | X                                |         |                                                                                    | X                                                                                                                       |            |            | X                                                                                     | X          |
| HbA1c                                                                 | X                                |         |                                                                                    | X                                                                                                                       |            |            | X                                                                                     |            |
| 1,5 anhydroglucitol and blood biomarkers for storage (Australia only) | x                                |         |                                                                                    | x                                                                                                                       |            |            | x                                                                                     | x          |
| Renal function and full blood count                                   | X                                |         |                                                                                    |                                                                                                                         |            |            |                                                                                       |            |
| Height/weight                                                         | X                                |         |                                                                                    | X                                                                                                                       |            |            | X                                                                                     | X          |
| Pregnancy test <sup>c</sup>                                           | X                                |         |                                                                                    |                                                                                                                         |            |            |                                                                                       |            |
| Carbohydrate counting education                                       |                                  | X       |                                                                                    |                                                                                                                         |            |            |                                                                                       |            |
| Dietary assessment <sup>d</sup>                                       | X                                |         |                                                                                    | X                                                                                                                       |            |            | X                                                                                     | X          |
| Insulin pump training                                                 |                                  | X       |                                                                                    |                                                                                                                         |            |            |                                                                                       |            |
| Blinded CGM <sup>e</sup>                                              |                                  | X       |                                                                                    |                                                                                                                         |            |            |                                                                                       |            |
| Randomisation                                                         |                                  |         |                                                                                    | X                                                                                                                       |            |            |                                                                                       |            |
| INSPIRE and EQ-5D questionnaires                                      | X                                |         |                                                                                    | X <sup>f</sup>                                                                                                          |            |            | X <sup>f</sup>                                                                        |            |
| SUS Questionnaire                                                     |                                  |         |                                                                                    |                                                                                                                         |            |            | X                                                                                     |            |
| Qualitative interview <sup>g</sup>                                    |                                  |         |                                                                                    |                                                                                                                         |            |            | X                                                                                     |            |
| Weekly review of CGM data and pump settings                           |                                  |         | ←→                                                                                 |                                                                                                                         | ←→         |            | ←→                                                                                    |            |
| AE collection                                                         |                                  |         | ←→                                                                                 |                                                                                                                         |            |            |                                                                                       |            |
| Concomitant medication check                                          |                                  |         | ←→                                                                                 |                                                                                                                         |            |            |                                                                                       |            |

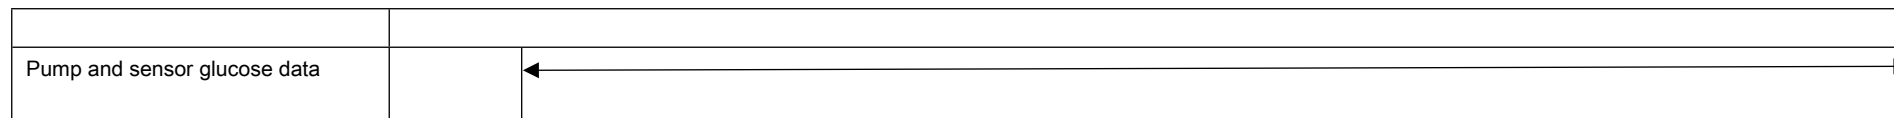

<sup>a</sup>Age, gender, ethnicity, highest level of education, length of time with diabetes, usual mode of insulin delivery. <sup>b</sup>Includes review of current diabetes management. <sup>c</sup>Pregnancy test for females of childbearing potential only (all post-menarchal and pre-menopausal women). <sup>d</sup>Dietary assessment: daily carbohydrate intake during 3 separate days, recorded using Easy Diet Diary. <sup>e</sup>Blinded CGM: 14 days blinded CGM using Dexcom G6 system while continuing usual diabetes management. >75% blinded CGM capture is required before proceeding to run-in phase. <sup>f</sup>Post-intervention questionnaire. <sup>g</sup>Qualitative interview in up to 15 participants in the fully automated closed loop arm (Group A).

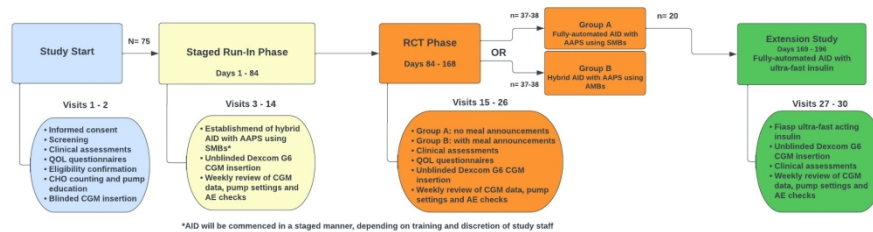

Study flow diagram

345x95mm (160 x 160 DPI)



# Reporting checklist for protocol of a clinical trial.

Based on the SPIRIT guidelines.

## Instructions to authors

Complete this checklist by entering the page numbers from your manuscript where readers will find each of the items listed below.

Your article may not currently address all the items on the checklist. Please modify your text to include the missing information. If you are certain that an item does not apply, please write "n/a" and provide a short explanation.

Upload your completed checklist as an extra file when you submit to a journal.

In your methods section, say that you used the SPIRIT reporting guidelines, and cite them as:

Chan A-W, Tetzlaff JM, Gøtzsche PC, Altman DG, Mann H, Berlin J, Dickersin K, Hróbjartsson A, Schulz KF, Parulekar WR, Krleža-Jerić K, Laupacis A, Moher D. SPIRIT 2013 Explanation and Elaboration: Guidance for protocols of clinical trials. *BMJ*. 2013;346:e7586

|                                   |                    |                                                                                                              | Page<br>Number |
|-----------------------------------|--------------------|--------------------------------------------------------------------------------------------------------------|----------------|
| <b>Administrative information</b> |                    |                                                                                                              |                |
| Title                             | <a href="#">#1</a> | Descriptive title identifying the study design, population, interventions, and, if applicable, trial acronym | 1              |

|                                                                                                                            |                                                                  |                     |                                                                                                                                                                                                                                                                                          |                         |
|----------------------------------------------------------------------------------------------------------------------------|------------------------------------------------------------------|---------------------|------------------------------------------------------------------------------------------------------------------------------------------------------------------------------------------------------------------------------------------------------------------------------------------|-------------------------|
| 1<br>2<br>3<br>4<br>5                                                                                                      | Trial registration                                               | <a href="#">#2a</a> | Trial identifier and registry name. If not yet registered, name of intended registry                                                                                                                                                                                                     | 2                       |
| 6<br>7<br>8<br>9<br>10                                                                                                     | Trial registration:<br>data set                                  | <a href="#">#2b</a> | All items from the World Health Organization Trial Registration Data Set                                                                                                                                                                                                                 | 2                       |
| 11<br>12<br>13<br>14<br>15<br>16                                                                                           | Protocol version                                                 | <a href="#">#3</a>  | Date and version identifier                                                                                                                                                                                                                                                              | Available on<br>request |
| 17<br>18<br>19<br>20<br>21<br>22                                                                                           | Funding                                                          | <a href="#">#4</a>  | Sources and types of financial, material, and other support                                                                                                                                                                                                                              | 13                      |
| 23<br>24<br>25<br>26<br>27<br>28<br>29                                                                                     | Roles and<br>responsibilities:<br>contributorship                | <a href="#">#5a</a> | Names, affiliations, and roles of protocol contributors                                                                                                                                                                                                                                  | 13                      |
| 30<br>31<br>32<br>33<br>34<br>35<br>36<br>37<br>38<br>39                                                                   | Roles and<br>responsibilities:<br>sponsor contact<br>information | <a href="#">#5b</a> | Name and contact information for the trial sponsor                                                                                                                                                                                                                                       | 13                      |
| 40<br>41<br>42<br>43<br>44<br>45<br>46<br>47<br>48<br>49<br>50<br>51<br>52<br>53<br>54<br>55<br>56<br>57<br>58<br>59<br>60 | Roles and<br>responsibilities:<br>sponsor and funder             | <a href="#">#5c</a> | Role of study sponsor and funders, if any, in study design; collection, management, analysis, and interpretation of data; writing of the report; and the decision to submit the report for publication, including whether they will have ultimate authority over any of these activities | n/a                     |

|    |                           |                     |                                                          |              |
|----|---------------------------|---------------------|----------------------------------------------------------|--------------|
| 1  | Roles and                 | <a href="#">#5d</a> | Composition, roles, and responsibilities of the          | Available on |
| 2  |                           |                     |                                                          |              |
| 3  | responsibilities:         |                     | coordinating centre, steering committee, endpoint        | request      |
| 4  |                           |                     |                                                          |              |
| 5  | committees                |                     | adjudication committee, data management team, and        |              |
| 6  |                           |                     |                                                          |              |
| 7  |                           |                     | other individuals or groups overseeing the trial, if     |              |
| 8  |                           |                     |                                                          |              |
| 9  |                           |                     | applicable (see Item 21a for data monitoring             |              |
| 10 |                           |                     |                                                          |              |
| 11 |                           |                     | committee)                                               |              |
| 12 |                           |                     |                                                          |              |
| 13 |                           |                     |                                                          |              |
| 14 |                           |                     |                                                          |              |
| 15 | <b>Introduction</b>       |                     |                                                          |              |
| 16 |                           |                     |                                                          |              |
| 17 |                           |                     |                                                          |              |
| 18 | Background and            | <a href="#">#6a</a> | Description of research question and justification for   | 4            |
| 19 |                           |                     |                                                          |              |
| 20 | rationale                 |                     | undertaking the trial, including summary of relevant     |              |
| 21 |                           |                     |                                                          |              |
| 22 |                           |                     | studies (published and unpublished) examining            |              |
| 23 |                           |                     |                                                          |              |
| 24 |                           |                     | benefits and harms for each intervention                 |              |
| 25 |                           |                     |                                                          |              |
| 26 |                           |                     |                                                          |              |
| 27 |                           |                     |                                                          |              |
| 28 | Background and            | <a href="#">#6b</a> | Explanation for choice of comparators                    | 4            |
| 29 |                           |                     |                                                          |              |
| 30 | rationale: choice of      |                     |                                                          |              |
| 31 |                           |                     |                                                          |              |
| 32 | comparators               |                     |                                                          |              |
| 33 |                           |                     |                                                          |              |
| 34 |                           |                     |                                                          |              |
| 35 |                           |                     |                                                          |              |
| 36 | Objectives                | <a href="#">#7</a>  | Specific objectives or hypotheses                        | 5            |
| 37 |                           |                     |                                                          |              |
| 38 |                           |                     |                                                          |              |
| 39 | Trial design              | <a href="#">#8</a>  | Description of trial design including type of trial (eg, | 5            |
| 40 |                           |                     |                                                          |              |
| 41 |                           |                     | parallel group, crossover, factorial, single group),     |              |
| 42 |                           |                     |                                                          |              |
| 43 |                           |                     | allocation ratio, and framework (eg, superiority,        |              |
| 44 |                           |                     |                                                          |              |
| 45 |                           |                     | equivalence, non-inferiority, exploratory)               |              |
| 46 |                           |                     |                                                          |              |
| 47 |                           |                     |                                                          |              |
| 48 |                           |                     |                                                          |              |
| 49 | <b>Methods:</b>           |                     |                                                          |              |
| 50 |                           |                     |                                                          |              |
| 51 | <b>Participants,</b>      |                     |                                                          |              |
| 52 |                           |                     |                                                          |              |
| 53 | <b>interventions, and</b> |                     |                                                          |              |
| 54 |                           |                     |                                                          |              |
| 55 | <b>outcomes</b>           |                     |                                                          |              |
| 56 |                           |                     |                                                          |              |
| 57 |                           |                     |                                                          |              |
| 58 |                           |                     |                                                          |              |
| 59 |                           |                     |                                                          |              |
| 60 |                           |                     |                                                          |              |

|    |                      |                      |                                                        |      |
|----|----------------------|----------------------|--------------------------------------------------------|------|
| 1  | Study setting        | <a href="#">#9</a>   | Description of study settings (eg, community clinic,   | 7    |
| 2  |                      |                      | academic hospital) and list of countries where data    |      |
| 3  |                      |                      | will be collected. Reference to where list of study    |      |
| 4  |                      |                      | sites can be obtained                                  |      |
| 5  |                      |                      |                                                        |      |
| 6  |                      |                      |                                                        |      |
| 7  |                      |                      |                                                        |      |
| 8  |                      |                      |                                                        |      |
| 9  |                      |                      |                                                        |      |
| 10 |                      |                      |                                                        |      |
| 11 | Eligibility criteria | <a href="#">#10</a>  | Inclusion and exclusion criteria for participants. If  | 7    |
| 12 |                      |                      | applicable, eligibility criteria for study centres and |      |
| 13 |                      |                      | individuals who will perform the interventions (eg,    |      |
| 14 |                      |                      | surgeons, psychotherapists)                            |      |
| 15 |                      |                      |                                                        |      |
| 16 |                      |                      |                                                        |      |
| 17 |                      |                      |                                                        |      |
| 18 |                      |                      |                                                        |      |
| 19 |                      |                      |                                                        |      |
| 20 |                      |                      |                                                        |      |
| 21 | Interventions:       | <a href="#">#11a</a> | Interventions for each group with sufficient detail to | 5    |
| 22 |                      |                      | allow replication, including how and when they will be |      |
| 23 | description          |                      | administered                                           |      |
| 24 |                      |                      |                                                        |      |
| 25 |                      |                      |                                                        |      |
| 26 |                      |                      |                                                        |      |
| 27 |                      |                      |                                                        |      |
| 28 |                      |                      |                                                        |      |
| 29 | Interventions:       | <a href="#">#11b</a> | Criteria for discontinuing or modifying allocated      | n/a  |
| 30 |                      |                      | interventions for a given trial participant (eg, drug  |      |
| 31 | modifications        |                      | dose change in response to harms, participant          |      |
| 32 |                      |                      | request, or improving / worsening disease)             |      |
| 33 |                      |                      |                                                        |      |
| 34 |                      |                      |                                                        |      |
| 35 |                      |                      |                                                        |      |
| 36 |                      |                      |                                                        |      |
| 37 |                      |                      |                                                        |      |
| 38 |                      |                      |                                                        |      |
| 39 | Interventions:       | <a href="#">#11c</a> | Strategies to improve adherence to intervention        | 9-10 |
| 40 |                      |                      | protocols, and any procedures for monitoring           |      |
| 41 | adherence            |                      | adherence (eg, drug tablet return; laboratory tests)   |      |
| 42 |                      |                      |                                                        |      |
| 43 |                      |                      |                                                        |      |
| 44 |                      |                      |                                                        |      |
| 45 |                      |                      |                                                        |      |
| 46 | Interventions:       | <a href="#">#11d</a> | Relevant concomitant care and interventions that are   | n/a  |
| 47 |                      |                      | permitted or prohibited during the trial               |      |
| 48 | concomitant care     |                      |                                                        |      |
| 49 |                      |                      |                                                        |      |
| 50 |                      |                      |                                                        |      |
| 51 | Outcomes             | <a href="#">#12</a>  | Primary, secondary, and other outcomes, including      | 8-10 |
| 52 |                      |                      | the specific measurement variable (eg, systolic blood  |      |
| 53 |                      |                      | pressure), analysis metric (eg, change from baseline,  |      |
| 54 |                      |                      |                                                        |      |
| 55 |                      |                      |                                                        |      |
| 56 |                      |                      |                                                        |      |
| 57 |                      |                      |                                                        |      |
| 58 |                      |                      |                                                        |      |
| 59 |                      |                      |                                                        |      |
| 60 |                      |                      |                                                        |      |

1 final value, time to event), method of aggregation (eg,  
 2 median, proportion), and time point for each  
 3 outcome. Explanation of the clinical relevance of  
 4 chosen efficacy and harm outcomes is strongly  
 5 recommended

6  
 7  
 8  
 9  
 10  
 11  
 12  
 13 Participant timeline [#13](#) Time schedule of enrolment, interventions (including Table 3  
 14 any run-ins and washouts), assessments, and visits  
 15 for participants. A schematic diagram is highly  
 16 recommended (see Figure)

17  
 18  
 19  
 20  
 21  
 22 Sample size [#14](#) Estimated number of participants needed to achieve 7  
 23 study objectives and how it was determined,  
 24 including clinical and statistical assumptions  
 25 supporting any sample size calculations

26  
 27  
 28  
 29  
 30  
 31  
 32 Recruitment [#15](#) Strategies for achieving adequate participant 7  
 33 enrolment to reach target sample size

### 34 35 36 37 38 **Methods:**

### 39 40 **Assignment of** 41 **interventions (for** 42 **controlled trials)**

43  
 44  
 45  
 46  
 47 Allocation: sequence [#16a](#) Method of generating the allocation sequence (eg, 8  
 48 generation computer-generated random numbers), and list of  
 49 any factors for stratification. To reduce predictability  
 50 of a random sequence, details of any planned  
 51 restriction (eg, blocking) should be provided in a

|    |                        |                                                                            |      |
|----|------------------------|----------------------------------------------------------------------------|------|
| 1  |                        | separate document that is unavailable to those who                         |      |
| 2  |                        |                                                                            |      |
| 3  |                        | enrol participants or assign interventions                                 |      |
| 4  |                        |                                                                            |      |
| 5  |                        |                                                                            |      |
| 6  | Allocation             | <a href="#">#16b</a> Mechanism of implementing the allocation sequence     | 8    |
| 7  |                        |                                                                            |      |
| 8  | concealment            | (eg, central telephone; sequentially numbered,                             |      |
| 9  |                        |                                                                            |      |
| 10 | mechanism              | opaque, sealed envelopes), describing any steps to                         |      |
| 11 |                        |                                                                            |      |
| 12 |                        | conceal the sequence until interventions are                               |      |
| 13 |                        |                                                                            |      |
| 14 |                        | assigned                                                                   |      |
| 15 |                        |                                                                            |      |
| 16 |                        |                                                                            |      |
| 17 |                        |                                                                            |      |
| 18 | Allocation:            | <a href="#">#16c</a> Who will generate the allocation sequence, who will   | 8    |
| 19 |                        |                                                                            |      |
| 20 | implementation         | enrol participants, and who will assign participants to                    |      |
| 21 |                        |                                                                            |      |
| 22 |                        | interventions                                                              |      |
| 23 |                        |                                                                            |      |
| 24 |                        |                                                                            |      |
| 25 | Blinding (masking)     | <a href="#">#17a</a> Who will be blinded after assignment to interventions | 10   |
| 26 |                        |                                                                            |      |
| 27 |                        | (eg, trial participants, care providers, outcome                           |      |
| 28 |                        |                                                                            |      |
| 29 |                        | assessors, data analysts), and how                                         |      |
| 30 |                        |                                                                            |      |
| 31 |                        |                                                                            |      |
| 32 |                        |                                                                            |      |
| 33 | Blinding (masking):    | <a href="#">#17b</a> If blinded, circumstances under which unblinding is   | n/a  |
| 34 |                        |                                                                            |      |
| 35 | emergency              | permissible, and procedure for revealing a                                 |      |
| 36 |                        |                                                                            |      |
| 37 | unblinding             | participant's allocated intervention during the trial                      |      |
| 38 |                        |                                                                            |      |
| 39 |                        |                                                                            |      |
| 40 |                        |                                                                            |      |
| 41 | <b>Methods: Data</b>   |                                                                            |      |
| 42 |                        |                                                                            |      |
| 43 | <b>collection,</b>     |                                                                            |      |
| 44 |                        |                                                                            |      |
| 45 | <b>management, and</b> |                                                                            |      |
| 46 |                        |                                                                            |      |
| 47 | <b>analysis</b>        |                                                                            |      |
| 48 |                        |                                                                            |      |
| 49 |                        |                                                                            |      |
| 50 |                        |                                                                            |      |
| 51 | Data collection plan   | <a href="#">#18a</a> Plans for assessment and collection of outcome,       | 9-10 |
| 52 |                        |                                                                            |      |
| 53 |                        | baseline, and other trial data, including any related                      |      |
| 54 |                        |                                                                            |      |
| 55 |                        | processes to promote data quality (eg, duplicate                           |      |
| 56 |                        |                                                                            |      |
| 57 |                        | measurements, training of assessors) and a                                 |      |
| 58 |                        |                                                                            |      |
| 59 |                        |                                                                            |      |
| 60 |                        |                                                                            |      |

|    |                        |                                                                             |       |
|----|------------------------|-----------------------------------------------------------------------------|-------|
| 1  |                        | description of study instruments (eg, questionnaires,                       |       |
| 2  |                        | laboratory tests) along with their reliability and                          |       |
| 3  |                        | validity, if known. Reference to where data collection                      |       |
| 4  |                        | forms can be found, if not in the protocol                                  |       |
| 5  |                        |                                                                             |       |
| 6  |                        |                                                                             |       |
| 7  |                        |                                                                             |       |
| 8  |                        |                                                                             |       |
| 9  |                        |                                                                             |       |
| 10 | Data collection plan:  | <a href="#">#18b</a> Plans to promote participant retention and complete    | 10-11 |
| 11 | retention              | follow-up, including list of any outcome data to be                         |       |
| 12 |                        | collected for participants who discontinue or deviate                       |       |
| 13 |                        | from intervention protocols                                                 |       |
| 14 |                        |                                                                             |       |
| 15 |                        |                                                                             |       |
| 16 |                        |                                                                             |       |
| 17 |                        |                                                                             |       |
| 18 |                        |                                                                             |       |
| 19 |                        |                                                                             |       |
| 20 | Data management        | <a href="#">#19</a> Plans for data entry, coding, security, and storage,    | 11    |
| 21 |                        | including any related processes to promote data                             |       |
| 22 |                        | quality (eg, double data entry; range checks for data                       |       |
| 23 |                        | values). Reference to where details of data                                 |       |
| 24 |                        | management procedures can be found, if not in the                           |       |
| 25 |                        | protocol                                                                    |       |
| 26 |                        |                                                                             |       |
| 27 |                        |                                                                             |       |
| 28 |                        |                                                                             |       |
| 29 |                        |                                                                             |       |
| 30 |                        |                                                                             |       |
| 31 |                        |                                                                             |       |
| 32 |                        |                                                                             |       |
| 33 |                        |                                                                             |       |
| 34 | Statistics: outcomes   | <a href="#">#20a</a> Statistical methods for analysing primary and          | 10-11 |
| 35 |                        | secondary outcomes. Reference to where other                                |       |
| 36 |                        | details of the statistical analysis plan can be found, if                   |       |
| 37 |                        | not in the protocol                                                         |       |
| 38 |                        |                                                                             |       |
| 39 |                        |                                                                             |       |
| 40 |                        |                                                                             |       |
| 41 |                        |                                                                             |       |
| 42 |                        |                                                                             |       |
| 43 |                        |                                                                             |       |
| 44 | Statistics: additional | <a href="#">#20b</a> Methods for any additional analyses (eg, subgroup      | 10-11 |
| 45 | analyses               | and adjusted analyses)                                                      |       |
| 46 |                        |                                                                             |       |
| 47 |                        |                                                                             |       |
| 48 |                        |                                                                             |       |
| 49 |                        |                                                                             |       |
| 50 | Statistics: analysis   | <a href="#">#20c</a> Definition of analysis population relating to protocol | 10-11 |
| 51 | population and         | non-adherence (eg, as randomised analysis), and                             |       |
| 52 | missing data           | any statistical methods to handle missing data (eg,                         |       |
| 53 |                        | multiple imputation)                                                        |       |
| 54 |                        |                                                                             |       |
| 55 |                        |                                                                             |       |
| 56 |                        |                                                                             |       |
| 57 |                        |                                                                             |       |
| 58 |                        |                                                                             |       |
| 59 |                        |                                                                             |       |
| 60 |                        |                                                                             |       |

1 **Methods: Monitoring**

2

3

4 Data monitoring: [#21a](#) Composition of data monitoring committee (DMC); 13

5 formal committee

6 summary of its role and reporting structure; statement

7 of whether it is independent from the sponsor and

8 competing interests; and reference to where further

9 details about its charter can be found, if not in the

10 protocol. Alternatively, an explanation of why a DMC

11 is not needed

12

13

14

15

16

17

18

19

20

21 Data monitoring: [#21b](#) Description of any interim analyses and stopping n/a

22 interim analysis

23 guidelines, including who will have access to these

24 interim results and make the final decision to

25 terminate the trial

26

27

28

29

30

31 Harms [#22](#) Plans for collecting, assessing, reporting, and 12-13

32 managing solicited and spontaneously reported

33 adverse events and other unintended effects of trial

34 interventions or trial conduct

35

36

37

38

39

40

41 Auditing [#23](#) Frequency and procedures for auditing trial conduct, n/a

42 if any, and whether the process will be independent

43 from investigators and the sponsor

44

45

46

47

48 **Ethics and**

49 **dissemination**

50

51

52

53

54 Research ethics [#24](#) Plans for seeking research ethics committee / 12

55 approval

56 institutional review board (REC / IRB) approval

57

58

59

60



|    |                    |                      |                                                         |              |
|----|--------------------|----------------------|---------------------------------------------------------|--------------|
| 1  | Protocol           | <a href="#">#25</a>  | Plans for communicating important protocol              | Available on |
| 2  |                    |                      |                                                         |              |
| 3  | amendments         |                      | modifications (eg, changes to eligibility criteria,     | request      |
| 4  |                    |                      |                                                         |              |
| 5  |                    |                      | outcomes, analyses) to relevant parties (eg,            |              |
| 6  |                    |                      | investigators, REC / IRBs, trial participants, trial    |              |
| 7  |                    |                      | registries, journals, regulators)                       |              |
| 8  |                    |                      |                                                         |              |
| 9  |                    |                      |                                                         |              |
| 10 |                    |                      |                                                         |              |
| 11 |                    |                      |                                                         |              |
| 12 |                    |                      |                                                         |              |
| 13 | Consent or assent  | <a href="#">#26a</a> | Who will obtain informed consent or assent from         | 12           |
| 14 |                    |                      |                                                         |              |
| 15 |                    |                      | potential trial participants or authorised surrogates,  |              |
| 16 |                    |                      |                                                         |              |
| 17 |                    |                      | and how (see Item 32)                                   |              |
| 18 |                    |                      |                                                         |              |
| 19 |                    |                      |                                                         |              |
| 20 |                    |                      |                                                         |              |
| 21 | Consent or assent: | <a href="#">#26b</a> | Additional consent provisions for collection and use    | 12           |
| 22 |                    |                      |                                                         |              |
| 23 | ancillary studies  |                      | of participant data and biological specimens in         |              |
| 24 |                    |                      |                                                         |              |
| 25 |                    |                      | ancillary studies, if applicable                        |              |
| 26 |                    |                      |                                                         |              |
| 27 |                    |                      |                                                         |              |
| 28 |                    |                      |                                                         |              |
| 29 | Confidentiality    | <a href="#">#27</a>  | How personal information about potential and            | 11           |
| 30 |                    |                      |                                                         |              |
| 31 |                    |                      | enrolled participants will be collected, shared, and    |              |
| 32 |                    |                      |                                                         |              |
| 33 |                    |                      | maintained in order to protect confidentiality before,  |              |
| 34 |                    |                      |                                                         |              |
| 35 |                    |                      | during, and after the trial                             |              |
| 36 |                    |                      |                                                         |              |
| 37 |                    |                      |                                                         |              |
| 38 |                    |                      |                                                         |              |
| 39 | Declaration of     | <a href="#">#28</a>  | Financial and other competing interests for principal   | 13           |
| 40 |                    |                      |                                                         |              |
| 41 | interests          |                      | investigators for the overall trial and each study site |              |
| 42 |                    |                      |                                                         |              |
| 43 |                    |                      |                                                         |              |
| 44 | Data access        | <a href="#">#29</a>  | Statement of who will have access to the final trial    | No access    |
| 45 |                    |                      |                                                         |              |
| 46 |                    |                      | dataset, and disclosure of contractual agreements       | planned      |
| 47 |                    |                      |                                                         |              |
| 48 |                    |                      | that limit such access for investigators                | outside of   |
| 49 |                    |                      |                                                         |              |
| 50 |                    |                      |                                                         |              |
| 51 |                    |                      |                                                         | named        |
| 52 |                    |                      |                                                         |              |
| 53 |                    |                      |                                                         | authors      |
| 54 |                    |                      |                                                         |              |
| 55 |                    |                      |                                                         |              |
| 56 |                    |                      |                                                         |              |
| 57 |                    |                      |                                                         |              |
| 58 |                    |                      |                                                         |              |
| 59 |                    |                      |                                                         |              |
| 60 |                    |                      |                                                         |              |

|                                                                                      |                                                   |                      |                                                                                                                                                                                                                                                                                                    |                         |
|--------------------------------------------------------------------------------------|---------------------------------------------------|----------------------|----------------------------------------------------------------------------------------------------------------------------------------------------------------------------------------------------------------------------------------------------------------------------------------------------|-------------------------|
| 1<br>2<br>3<br>4<br>5<br>6<br>7                                                      | Ancillary and post<br>trial care                  | <a href="#">#30</a>  | Provisions, if any, for ancillary and post-trial care, and<br>for compensation to those who suffer harm from trial<br>participation                                                                                                                                                                | 12                      |
| 8<br>9<br>10<br>11<br>12<br>13<br>14<br>15<br>16<br>17<br>18<br>19<br>20<br>21<br>22 | Dissemination<br>policy: trial results            | <a href="#">#31a</a> | Plans for investigators and sponsor to communicate<br>trial results to participants, healthcare professionals,<br>the public, and other relevant groups (eg, via<br>publication, reporting in results databases, or other<br>data sharing arrangements), including any publication<br>restrictions | 13                      |
| 23<br>24<br>25<br>26<br>27                                                           | Dissemination<br>policy: authorship               | <a href="#">#31b</a> | Authorship eligibility guidelines and any intended use<br>of professional writers                                                                                                                                                                                                                  | n/a                     |
| 28<br>29<br>30<br>31<br>32<br>33<br>34<br>35                                         | Dissemination<br>policy: reproducible<br>research | <a href="#">#31c</a> | Plans, if any, for granting public access to the full<br>protocol, participant-level dataset, and statistical code                                                                                                                                                                                 | n/a                     |
| 36<br>37<br>38                                                                       | <b>Appendices</b>                                 |                      |                                                                                                                                                                                                                                                                                                    |                         |
| 39<br>40<br>41<br>42<br>43<br>44                                                     | Informed consent<br>materials                     | <a href="#">#32</a>  | Model consent form and other related documentation<br>given to participants and authorised surrogates                                                                                                                                                                                              | Available on<br>request |
| 45<br>46<br>47<br>48<br>49<br>50<br>51<br>52<br>53                                   | Biological<br>specimens                           | <a href="#">#33</a>  | Plans for collection, laboratory evaluation, and<br>storage of biological specimens for genetic or<br>molecular analysis in the current trial and for future<br>use in ancillary studies, if applicable                                                                                            | 10                      |

None The SPIRIT Explanation and Elaboration paper is distributed under the terms of the Creative Commons Attribution License CC-BY-NC. This checklist can be completed online using

1 <https://www.goodreports.org/>, a tool made by the [EQUATOR Network](#) in collaboration with  
2  
3 [Penelope.ai](#)  
4  
5  
6  
7  
8  
9  
10  
11  
12  
13  
14  
15  
16  
17  
18  
19  
20  
21  
22  
23  
24  
25  
26  
27  
28  
29  
30  
31  
32  
33  
34  
35  
36  
37  
38  
39  
40  
41  
42  
43  
44  
45  
46  
47  
48  
49  
50  
51  
52  
53  
54  
55  
56  
57  
58  
59  
60

For peer review only

# BMJ Open

**Study protocol for a randomised open label clinical trial examining the safety and efficacy of the Android Artificial Pancreas System (AAPS) with advanced bolus-free features in adults with type 1 diabetes: the 'CLOSE IT' (Closed Loop Open Source In Type 1 diabetes) trial**

|                                 |                                                                                                                                                                                                                                                                                                                                                                                                                                                                                                                                                                                                                                                                                                                                             |
|---------------------------------|---------------------------------------------------------------------------------------------------------------------------------------------------------------------------------------------------------------------------------------------------------------------------------------------------------------------------------------------------------------------------------------------------------------------------------------------------------------------------------------------------------------------------------------------------------------------------------------------------------------------------------------------------------------------------------------------------------------------------------------------|
| Journal:                        | <i>BMJ Open</i>                                                                                                                                                                                                                                                                                                                                                                                                                                                                                                                                                                                                                                                                                                                             |
| Manuscript ID                   | bmjopen-2023-078171.R1                                                                                                                                                                                                                                                                                                                                                                                                                                                                                                                                                                                                                                                                                                                      |
| Article Type:                   | Protocol                                                                                                                                                                                                                                                                                                                                                                                                                                                                                                                                                                                                                                                                                                                                    |
| Date Submitted by the Author:   | 19-Oct-2023                                                                                                                                                                                                                                                                                                                                                                                                                                                                                                                                                                                                                                                                                                                                 |
| Complete List of Authors:       | Wilkinson, Tom; University of Otago Christchurch<br>Tomic, Dunya; Baker Heart and Diabetes Institute; Monash University, School of Public Health and Preventive Medicine<br>Boyle, Erin; Baker Heart and Diabetes Institute<br>Burren, David; Baker Heart and Diabetes Institute<br>Elghattis, Yasser; Baker Heart and Diabetes Institute<br>Jenkins, Alicia; Baker Heart and Diabetes Institute<br>Keesing, Celeste; University of Otago Christchurch<br>Middleton, Sonia; Baker Heart and Diabetes Institute<br>Nanayakkara, Natalie; Baker Heart and Diabetes Institute<br>Williman, Jonathan; University of Otago Christchurch<br>de Bock, Martin; University of Otago Christchurch<br>Cohen, Neale; Baker Heart and Diabetes Institute |
| <b>Primary Subject Heading</b>: | Diabetes and endocrinology                                                                                                                                                                                                                                                                                                                                                                                                                                                                                                                                                                                                                                                                                                                  |
| Secondary Subject Heading:      | Diabetes and endocrinology                                                                                                                                                                                                                                                                                                                                                                                                                                                                                                                                                                                                                                                                                                                  |
| Keywords:                       | DIABETES & ENDOCRINOLOGY, Clinical Trial, General diabetes < DIABETES & ENDOCRINOLOGY                                                                                                                                                                                                                                                                                                                                                                                                                                                                                                                                                                                                                                                       |
|                                 |                                                                                                                                                                                                                                                                                                                                                                                                                                                                                                                                                                                                                                                                                                                                             |

SCHOLARONE™  
Manuscripts

1  
2  
3  
4 **Study protocol for a randomised open label clinical trial examining the safety and efficacy**  
5 **of the Android Artificial Pancreas System (AAPS) with advanced bolus-free features in**  
6 **adults with type 1 diabetes: the 'CLOSE IT' (Closed Loop Open SourcE In Type 1 diabetes)**  
7 **trial**  
8

9 Tom M Wilkinson<sup>1\*</sup>, Dunya Tomic<sup>2, 3\*</sup>, Erin Boyle<sup>2</sup>, David Burren<sup>2</sup>, Yasser Elghattis<sup>2</sup>, Alicia  
10 Jenkins<sup>2</sup>, Celeste Keesing<sup>1</sup>, Sonia Middleton<sup>2</sup>, Natalie Nanayakkara<sup>2</sup>, Jonathan Williman<sup>1</sup>,  
11 Martin de Bock<sup>1, 4^</sup>, Neale D Cohen<sup>2, 3, 5^</sup>  
12  
13

14 <sup>1</sup>University of Otago, Christchurch, New Zealand  
15

16 <sup>2</sup>Baker Heart and Diabetes Institute, Melbourne, Australia  
17

18 <sup>3</sup>School of Public Health and Preventive Medicine, Monash University, Melbourne, Australia  
19

20 <sup>4</sup>Te Whatu Ora Waitaha/Canterbury, Christchurch, New Zealand  
21

22 <sup>5</sup>The University of Queensland, Brisbane, Australia  
23

24 \*TMW and DT are joint first authors.  
25

26 ^NDC and MdB are joint senior authors.  
27

28  
29 Corresponding author:  
30

31 Tom Wilkinson  
32

33 [Thomas.wilkinson@cdhb.health.nz](mailto:Thomas.wilkinson@cdhb.health.nz)  
34

35 +64 27 353 6505  
36

37 4 Oxford Terrace, Christchurch 8011, New Zealand  
38

39 ORCID 0000-0002-9025-3778  
40

41 Keywords: Type 1 diabetes; closed loop; open-source; full automation  
42

43 Word count: 4117  
44  
45  
46  
47  
48  
49  
50  
51  
52  
53  
54  
55  
56  
57  
58  
59  
60

## ABSTRACT

**Introduction:** Multiple automated insulin delivery (AID) systems have become commercially available following randomised controlled trials demonstrating benefit in people with type 1 diabetes (T1D). However, their real-world utility may be undermined by user-associated burdens, including the need to carbohydrate count and deliver manual insulin boluses. There is an important need for a “fully-automated closed loop” (FCL) AID system, without manual mealtime boluses. The (Closed Loop Open Source In Type 1 diabetes) CLOSE IT trial is a randomised trial comparing a FCL AID system to the same system used as hybrid closed loop (HCL) in people with T1D, in an outpatient setting over an extended timeframe.

**Methods and analysis:** Randomised, open-label, parallel, non-inferiority trial comparing the Android Artificial Pancreas System (AAPS) AID algorithm used as FCL to the same algorithm used as HCL. Seventy-five participants aged 18-70 will be randomised (1:1) to one of two treatment arms for 12 weeks: (a) FCL – participants will be advised not to bolus for meals; (b) HCL – participants will use the AAPS AID algorithm as HCL with announced meals. The primary outcome is the percentage of time in target sensor glucose range (3.9-10.0mmol/L) (TIR). Secondary outcomes include other glycaemic metrics, safety, psychosocial factors, platform performance, and user dietary factors. Twenty FCL arm participants will participate in a 4-week extension phase comparing glycaemic and dietary outcomes using NovoRapid® (insulin aspart) to Fiasp® (insulin aspart and niacinamide).

**Ethics and dissemination:** Approvals are by the Alfred Health Ethics Committee (615/22) (Australia) and Health and Disability Ethics Committees (2022 FULL 13832) (New Zealand). Each participant will provide written informed consent. Data protection and confidentiality will be ensured. Study results will be disseminated by publications, conferences and patient advocacy groups.

**Trial registration number:** ACTRN12622001400752 and ACTRN12622001401741.

**ARTICLE SUMMARY****Strengths and limitations of this study**

- CLOSE IT is a direct comparison of an automated insulin delivery (AID) system used as full closed loop (FCL) to that same system used as hybrid closed loop (HCL), in people with T1D during prolonged (12 weeks) outpatient follow-up.
- A 12-week run-in phase allows for optimisation of AID settings and pump self-management skills for all participants pre-randomisation.
- Dietary records and qualitative interviews will explore changes in dietary intake and attitudes in FCL system users.
- This trial is unmasked, with participants in both arms having access to the same devices, therefore there is a risk of spuriously concluding non-inferiority due to participant non-adherence.

## INTRODUCTION

Type 1 diabetes (T1D) is a chronic health condition with substantial self-management demands regarding lifestyle, diet, and insulin dosing. Despite technological advances including continuous glucose monitoring (CGM) and insulin pump therapy, most people with T1D do not attain glycaemic targets (1), exposing them to risk of acute and chronic complications. Automated insulin delivery (AID) systems, also termed closed loop or artificial pancreas systems combine insulin pump technology, CGM, and control algorithms, to automatically adjust insulin delivery based on interstitial fluid glucose sensor readings (2). Multiple AID systems have become commercially available following large randomised controlled trials demonstrating improved glycaemia in people with T1D when compared to sensor-augmented pump therapy (SAPT) (3-7). Participants in these trials delivered manual insulin boluses pre-meals and real-world users are advised to do the same, hence these systems are termed “hybrid closed loop” (HCL).

Despite clear glycaemic benefits, real-world utility of AID systems may be undermined by the burden associated with their use. Notably, reluctance to start AID, and AID discontinuation once started, have been reported as more prevalent in users with suboptimal baseline glycaemia (8, 9). Reducing inequity in diabetes outcomes therefore requires minimisation of perceived and actual burdens of AID use. The burden is multifactorial, including device-related factors (10) and difficulty trusting automated insulin dosing decisions (10-14). However, the need to deliver manual insulin boluses with carbohydrate counting is likely to be contributory in many users. Observational T1D studies have described frequent missed mealtime boluses in pump-users (15, 16), and inaccuracies in carbohydrate counting (17, 18). There is therefore an important need for an AID system which can be used as “fully-automated closed loop” (FCL), without manual mealtime boluses.

The *oref1* “reference design” algorithm introduced in OpenAPS (open-source artificial pancreas system) is also used in Android Artificial Pancreas System (AAPS) installed as an application on an Android phone. These “do-it-yourself” AID systems were first shared as open-source software in 2015 (19). The CREATE trial (n=97) found that those with T1D using *oref1* for 24 weeks in an outpatient setting had higher mean time in range (TIR; percentage of CGM recordings between 3.9-10.0 mmol/L) compared to those using SAPT (71.2 vs. 54.5%, p<0.001) (20). Results broadly aligned with comparable trials of commercial AID systems (3-7). Furthermore, a pilot crossover trial comparing *oref1* used as FCL to the same system used as HCL in adolescents with T1D during supervised 3-day periods found no significant difference in mean TIR (81 vs. 83%) (21). Further investigation is required to assess if these findings extrapolate to unselected patients in an unsupervised home environment.

Delayed insulin activity following subcutaneous injection is a barrier to attainment of glycaemic targets by any FCL system (22). Fiasp® is an ultra-rapid acting insulin preparation, containing insulin aspart and niacinamide. Compared to insulin aspart alone (NovoRapid®), subcutaneous injection of Fiasp® results in more rapid appearance of insulin in the intravascular space (23, 24). Fiasp® has shown modest improvements in TIR in trials of HCL systems (25, 26), and in a pivotal trial of the iLet Bionic Pancreas which uses “simplified meal



1  
2  
3 announcement" (27). Improved TIR has also been demonstrated with the ultra-rapid acting  
4 preparation Lyumjev® in HCL users (28). However, Fiasp® and NovoRapid® have only been  
5 directly compared in AID users consuming unannounced meals in small short-term studies  
6 (26, 29).  
7  
8

9 The CLOSE IT trial assesses the efficacy of AAPS as FCL. The primary study objective is to  
10 evaluate TIR, comparing AAPS used as FCL to AAPS used as HCL during 12 weeks use.  
11 Secondary outcomes are the effectiveness of AAPS used as FCL relative to AAPS used as HCL  
12 with regards to glycaemic control and safety (30); psychosocial factors; platform  
13 performance; and user dietary factors. The CLOSE IT trial also includes a 4-week extension  
14 phase during which participants using FCL will change from NovoRapid® to Fiasp®, assessing  
15 changes in glycaemic metrics.  
16  
17

## 18 19 **METHODS AND ANALYSIS**

### 20 21 **Study design**

22 The CLOSE IT trial is an open label, multi-site, randomised, parallel-group 12-week non-  
23 inferiority trial evaluating the effectiveness and safety of AAPS used as FCL compared to  
24 AAPS used as HCL in adults (aged 18-70 years) with T1D.  
25  
26  
27

28 All participants will complete a 12-week run-in phase, during which they become familiar  
29 with Dexcom G6® CGM and the Ypsomed insulin pump and initiate AAPS, used as HCL (see  
30 figure 1). Participants will then be randomly allocated (1:1) to one of two treatment groups:  
31  
32

- 33 A. Fully-automated closed loop system: Participants will continue to use AAPS, however  
34 will be advised not to bolus for meals, and not to correct high glucose levels unless  
35 they become symptomatic or sensor glucose levels are >15.0 mmol/L for ≥1 hour.  
36  
37
- 38 B. Hybrid closed loop system: Participants will continue to use AAPS as a hybrid closed  
39 loop system with manual mealtime boluses informed by carbohydrate counting,  
40 unchanged from therapy established during the run-in phase.  
41  
42

43 The RCT phase is 12 weeks duration, with the primary endpoint based on glycaemic data  
44 collected during the final 14 days.  
45  
46

### 47 **Run-in phase**

48 Following baseline assessments (Table 1), participants will be provided with an Ypsomed  
49 insulin pump, pump consumables, and unmasked Dexcom G6 CGM and trained in their use.  
50 Training will be customised for each individual to account for factors including prior  
51 familiarity with pump therapy and current glycaemia. NovoRapid® insulin will be exclusively  
52 used in the run-in and trial phases. A study dietitian will assess carbohydrate counting  
53 competency. Targeted education in carbohydrate counting will be provided if required.  
54  
55  
56

57 Participants will receive an Android phone containing a locked version of the oref1  
58 algorithm installed as an app ("Lotus"), effectively representing open-source AAPS. This  
59  
60

1  
2  
3 system uses a heuristic algorithm that estimates a glycaemia projection every 5 minutes  
4 based on current glucose levels, insulin doses, announced carbohydrate consumption, and  
5 user-specific parameters. When initially used, the system adjusts insulin dosing by  
6 modulating the basal rate. In order to permit possible FCL use, participants will  
7 subsequently activate “super micro boluses” (SMBs), which enable the system to deliver  
8 small, repeated boluses to correct high sensor glucose readings, and an “unannounced  
9 meals” feature, which allows the algorithm to detect (and treat) glycaemic excursions that  
10 may represent unannounced carbohydrate intake.  
11  
12  
13

14 The run-in phase is 84 days, with day 1 defined as the day on which the study insulin pump  
15 is first used to deliver insulin to the participant. During this phase participants will  
16 commence HCL therapy using AAPS. Participants may either commence SAPT on day 1 and  
17 later transition to AID, or they may commence AID on day 1. AAPS settings will be  
18 optimised, including activation of SMBs. Participants will be supported through regular (at  
19 least weekly) electronic review of CGM data and pump insulin delivery records by research  
20 staff. In-person study visits will be arranged as required. Table 2 summarises settings within  
21 oref1 that may be adjusted for each individual participant. Participants may choose to  
22 alternate between multiple profiles (each representing a combination of settings) and set  
23 temporary glucose targets, for example during exercise. While allowing a high degree of  
24 customisability, it is recognised that the large number of adjustable settings may add  
25 complexity. Adjustment of settings will be guided by regular meetings between research  
26 staff, sharing clinical and technical expertise.  
27  
28  
29  
30

31 Timing of AID commencement and optimisation of AAPS settings will be individualised for  
32 each participant; however, the target is for all participants to be established on AAPS with  
33 settings adjusted as best possible to optimise glycaemic control by day 70.  
34  
35

### 36 **Trial phase**

37  
38 The trial phase is 84 days, representing days 85-168 of the trial. Participants will be  
39 informed of their allocated treatment group. Those allocated to HCL will continue to use  
40 AAPS in a similar manner to the run-in phase. Those allocated to FCL will be asked to  
41 discontinue any meal announcement and only give a manual bolus if specified criteria are  
42 met (sensor-detected glucose >15.0 mmol/L for ≥1 hour, or symptomatic hyperglycaemia).  
43  
44  
45

46 Participants in both groups may continue to alternate between multiple profiles and take  
47 anticipatory measures prior to exercise, for example setting temporary glucose targets.  
48  
49

50 As in the run-in phase, participants will be supported through regular (at least weekly)  
51 electronic review of CGM data and pump insulin delivery records by research staff and in-  
52 person study visits as required. Further adjustments to oref1 settings may occur to optimise  
53 glycaemic control. Documentation of all reviews will be maintained to demonstrate that  
54 participants in both groups have equal access to clinical support.  
55  
56

### 57 **Extension phase**

1  
2  
3 Participants allocated to FCL will, at completion of the trial phase, be sequentially invited to  
4 participate in the 28-day extension phase representing days 169-196 of the trial.  
5 Participants will change the insulin used in the study pump from NovoRapid® (insulin aspart)  
6 to Fiasp® (insulin aspart and niacinamide), while continuing to use AAPS as FCL under the  
7 same conditions as the trial phase. Participants will continue to be supported through  
8 regular (at least weekly) electronic review of CGM data and pump settings by research staff,  
9 and in-person study visits as required.  
10  
11  
12

### 13 **Patient involvement**

14  
15 People with T1D were involved in protocol design. AAPS, as an open-source system, has  
16 been developed and refined by people living with T1D. Individuals with T1D will also  
17 contribute to trial conduct and to reporting and dissemination of trial results.  
18  
19

### 20 **Recruitment**

21  
22 The trial will enrol adults aged 18-70 with T1D at two sites: University of Otago, Christchurch  
23 (New Zealand) and the Baker Heart and Diabetes Institute, Melbourne (Australia).  
24 Recruitment commenced in April 2023 and is anticipated to be completed in 2024.  
25  
26

27 Study candidates will be identified by local clinicians. Formal recruitment will occur by  
28 research staff outside of routine clinical care, ensuring participants can provide informed  
29 consent free from undue influence. Evaluation of eligibility will be performed at screening  
30 according to inclusion and exclusion criteria (Table 3). To include a broad range of  
31 participants, these criteria allow for participants to be using either multiple daily insulin  
32 injections or insulin pump therapy at baseline, with no eligibility restrictions based on  
33 glycaemic metrics.  
34  
35  
36

### 37 **Sample size**

38  
39 The CLOSE IT trial has a non-inferiority design. Based on a mean TIR of 70% (SD 10%)  
40 approximating that seen in the HCL arm of the CREATE trial (20) and similarly designed trials  
41 of commercial HCL systems (3-7), and a largest clinically acceptable difference of 7% TIR, 70  
42 participants (35 in each group) are required to provide 90% power at  $\alpha=0.05$ . An overall  
43 sample size of 75 participants allows for five dropouts.  
44  
45  
46

47 The pre-specified non-inferiority margin of 7% difference in TIR is larger than the 3%  
48 difference in TIR recommended in the 2023 international consensus statement on CGM  
49 metrics in clinical trials (30), which was published after development of this protocol. This  
50 does not preclude a finding of non-inferiority at a 3% margin. A secondary outcome is the  
51 proportion of participants in each trial arm for whom TIR does not decrease by >5%,  
52 consistent with the international consensus on a significant change in TIR for an individual.  
53  
54  
55

56 A sample size of 20 participants in the extension phase will provide 80% power at two-sided  
57  $\alpha=0.05$  to detect a mean within-person absolute change of 5%, assuming a within-person  
58 standard deviation of 7.5%.  
59  
60

## Screening and enrolment

Individuals deemed a study candidate at pre-screening will be given the opportunity to review the participant information and consent form (PICF). Processes of obtaining informed consent will include the requirements of ISO 14155:2011 and Good Clinical Practice. All participants must sign and date the current ethics approved written informed consent form before any study specific assessments or procedures are performed. Additional consent will be sought for participation in interviews during the study as appropriate.

Table 1 delineates the baseline information which will be gathered post-consent, screening eligibility confirmation and enrolment in the study. Participants who do not usually use a Dexcom G6<sup>®</sup> CGM will be required to complete 14 days blinded CGM, with >75% sensor data capture. Participants who normally use a Dexcom G6<sup>®</sup> and who can provide CGM data from the preceding 14 days, will not be required to complete blinded CGM monitoring.

## Randomisation

Participants will be randomly allocated (1:1) to receive FCL or HCL therapy. A computer-generated randomisation list, with permuted blocks of random size, will be pre-prepared by the study statistician, who will not be involved in participant enrolment or treatment allocation. The randomisation list will be concealed and loaded into the Research Electronic Data Capture (REDCap) database on Baker Institute servers.

Participants may only be randomised on day 85, following completion of the run-in phase. Then, research staff with authorisation to randomise participants may click the “randomise” button within REDCap which will assign the treatment to the study number and lock the fields containing the treatment group. This process will ensure allocation is concealed from research staff and participants until after run-in phase completion.

## Primary outcome measures

The primary outcome is the percentage of time spent in target sensor glucose range (3.9-10.0 mmol/L) during the last 14 days of the trial phase, comparing FCL to HCL. Timing of all assessments is in Table 4.

## Secondary outcome measures

### *Glycaemic control*

HbA1c will be measured using a DCCT-aligned assay in local laboratories in venous blood from baseline and completion of the run-in and trial phases.

Individual CGM data will be pushed from the Android phone into a cloud-based server; Nightscout (described under Data Management). CGM data will be analysed according to standardised CGM metrics for clinical trials (30).

- Percentage of participants able to maintain TIR >70%
- Percentage of participants for whom TIR decreases by >5% between days 71-84 and days 155-168
- Time in tight range, defined as % CGM time 3.9-7.8 mmol/L
- % CGM time < 3.9 mmol/L
- % CGM time < 3.0 mmol/L
- % CGM time > 10.0 mmol/L
- % CGM time > 13.9 mmol/L
- Mean sensor glucose and glucose variability (expressed primarily as coefficient of variation and secondly as a standard deviation)
- Glycaemic outcomes differentiated as 24-hours, day (0600-2359 hours) and night (0000-0559 hours)

#### *Insulin delivery systems: perceptions, ideas, reflections, and expectations (INSPIRE)*

INSPIRE is a standardised tool with questions specific to AID systems, with demonstrated reliability of individual items on initial validation in a cohort of people with T1D (31). Participants will complete the 22-item adult baseline questionnaire during the study baseline assessment. Participants will complete the 22-item adult post-intervention questionnaire twice: at the end of the run-in phase (recognising that they will have used AID for most of this phase) and at the end of the trial phase.

#### *Health status (EuroQol 5-dimensional questionnaire 5-level; EQ-5D-5L)*

EQ-5D-5L is a generic patient-reported outcome questionnaire, with demonstrated validity and reliability in many disease areas (32). Although it does not provide information specific to AID use in T1D, as a widely used measure it can inform health economic analyses. EQ-5D-5L assesses overall health re: mobility, self-care, usual activities, pain/discomfort, and anxiety/depression. Participants rate their health on a given day on each dimension with five levels of severity and give a global rating of their health overall on a 0-100 scale. Participants will complete the questionnaire three times: baseline, end of run-in, and end of trial phase.

#### *System usability scale (SUS)*

SUS, a validated global tool suited to consumer products to assess the user experience (33), comprises a 10-item questionnaire. Responses generate a score from 0-100, with a higher score representing greater user-friendliness. Participants will complete the questionnaire once, at the end of the trial phase.

#### *Platform performance*

Insulin delivery data will also be pushed from the Android phone into Nightscout and used to analyse platform performance and to verify participant adherence to their allocated treatment group (FCL or HCL).

- Percentage time using AID.
- Frequency of manual insulin boluses, further categorised in the FCL arm as boluses delivered in accordance with protocol and boluses delivered outside of protocol.
- Total insulin dose delivered by manual boluses, expressed as a percentage of overall total insulin dose, further categorised in the fully-automated arm as boluses delivered in accordance with protocol and boluses delivered outside of protocol.

### *User dietary factors*

Participants will complete a 3-day diet record at study enrolment, between days 71-84 (run-in phase), between days 155-168 (trial phase), and between days 183-196 (extension phase). Diet records will be completed in the Easy Diet Diary app (Xyris Software Ltd, Australia) on the participant's phone, with assistance provided as required by a study dietitian. Participants will record all food, drinks, and times consumed in the app by searching the food database, scanning barcodes, and taking photos.

### *Qualitative interviews*

Up to 15 FCL group participants will be invited to a qualitative interview at completion of the trial phase, exploring their experiences. Verbatim transcripts will undergo descriptive qualitative thematic analysis.

### **Tertiary outcome measures**

#### *Biobanking*

Venous blood (plasma, serum and cell pellet) from participants in Australia will be stored (-80°C) for future testing at each time that HbA1c is tested. Analyses will relate to glycaemia (1,5 anhydroglucitol, glycated albumin), inflammation (CRP by high-sensitivity assay, vascular cell adhesion molecules), oxidative stress (myeloperoxidase, mitochondrial DNA copy number), and chronic complications (microRNAs).

#### **Masking**

Masking of participants and trialists is not possible due to the nature of the intervention, requiring participants to actively change the way in which they use the study devices.

#### **Data analysis**

A statistical analysis plan will be prepared by the study statistician and approved by principal investigators pre-analyses. Analysis will commence after the last participant has completed the RCT phase and will be use an up-to-date version of R, SAS, or Stata statistical software. CGM data, captured at 5-minute intervals throughout the study, will be used to calculate the primary endpoint (TIR) by dividing the number of CGM measures within the target glucose range (3.9 to 10.0 mmol/L) by the total number of CGM measures recorded. This primary, and all secondary CGM metrics, will be calculated for all participants during the last 14 days of the run-in phase (days 71-84) and the last 14 days of the RCT phase (days 155-

168). Study outcomes will be descriptively summarised by study phase and treatment group.

The primary endpoint, and all continuous secondary CGM endpoints, will be compared between treatment groups during the last 14 days of the RCT phase using constrained longitudinal data analysis. This model adjusts for baseline levels by forcing treatment groups to share a common mean value. Study site will be included as a fixed effect, but no other variables will be adjusted for. This model will be used to estimate the intervention effect (between group difference) with 95% CI. Other continuous secondary endpoints, collected during clinic visits at the start and end of the RCT phase (e.g. HbA1c and psychosocial factors), will be analysed in an identical manner.

It is recognised that in non-inferiority trials, both intention-to-treat and per protocol analyses risk biases that favour finding non-inferiority; intention-to-treat analysis may suffer due to treatment non-adherence, and per protocol analysis due to confounding (34). The primary analysis will be performed on the intent-to-treat population, and a per protocol analysis will also be performed and results considered when determining non-inferiority. For the per protocol analysis CGM metrics will be considered to belong to the FCL group on days where the participant has delivered no manual boluses outside of protocol conditions, or to the HCL group on days where the participant has delivered  $\geq 2$  manual boluses outside of protocol conditions. Thus, a single participant may belong to different treatment groups on different days.

### **Extension study outcome measures and analysis**

The extension study primary endpoint is TIR between days 183-196, calculated in a similar manner as above and compared to TIR during the last 14 days of the trial phase (days 155-168). The change in TIR after having changed from NovoRapid® to Fiasp® insulin will be calculated for each individual, and summarised for all 20 participants as mean and standard deviation with 95% CI. A paired t-test will be used to determine if the observed change is consistent with the null hypothesis of no change, with a two-sided  $p < 0.05$  used to determine statistical significance. Secondary metrics will be tested similarly, with the Benjamini and Hochberg method used to control false discovery rates associated with multiplicity of testing.

### **Data management**

Data flow and management will occur through Nightscout, an open-source remote monitoring tool. Individual data will be pushed from the Android phone into Nightscout. Raw data, including all pump data at  $\approx 5$ -minute intervals, will be uploaded de-identified to Nightscout. These data will then be downloaded onto secure servers at the Baker Institute and University of Otago. Nightscout accounts are de-identified to protect privacy and will only hold insulin pump and CGM data.

Qualitative interviews will be transcribed using Otter, an online artificial intelligence transcription service (Los Altos, USA). Interview content will be stored on an Otter-hosted online server, security of which is maintained by Otter and includes two-factor authentication to access participant data. Interviews will not collect personal identifying

1  
2  
3 data (e.g. name, address, employment information, health records, or financial  
4 information).  
5

6  
7 All other de-identified data, including demographic, auxological, clinical, diabetic, lifestyle  
8 and psychosocial questionnaires and AEs will be electronically stored on REDCap in secure  
9 Baker Institute servers. REDCap is a web-based application which supports data capture for  
10 research studies, providing validated data entry and audit trails for tracking data  
11 manipulation and export procedures, and custom modules for participant randomisation  
12 and scheduling data collection events.  
13  
14

15 Records containing identifying details of New Zealand-based participants will be securely  
16 stored at the University of Otago and accessed only by New Zealand study staff. Records  
17 containing identifying details of Australia-based participants will be securely stored at the  
18 Baker Institute. These records will be retained for at least 15 years.  
19 SPIRIT reporting guidelines for a protocol of a clinical trial (35) have been used.  
20  
21

## 22 **ETHICS AND DISSEMINATION**

23  
24  
25 The trial is registered with the Australian New Zealand Clinical Trials Registry  
26 (ACTRN12622001400752 and ACTRN12622001401741) and has been approved by the  
27 Alfred Health Ethics Committee (615/22) Australia and New Zealand Health and Disability  
28 Ethics Committees (2022 FULL 13832). Investigators will ensure the study conducted is in  
29 full conformance with the requirements of ISO 14155: 2011, the principles of the  
30 "Declaration of Helsinki" and with the laws and regulations of Australia and New Zealand. It  
31 is the responsibility of the investigator, or their designee to obtain signed and dated  
32 informed consent from each participant prior to study participation and after adequate  
33 explanation of the aims, methods, objectives, and potential hazards of the study and  
34 opportunity to ask questions and consider answers. If a participant is unable to give  
35 informed consent then the principal investigator will assess if the participant meets  
36 eligibility criteria. Any subject who cannot read or write English will be excluded as they  
37 would not be able to comply with study requirements. During the informed consent  
38 process, participants will be given the option to opt-in or opt-out of the extension phase,  
39 qualitative interview, and biobanking components of the trial.  
40  
41  
42  
43

44  
45 At trial-end participants will return to their usual Healthcare Professional team. New  
46 Zealand-based participants will be eligible to apply for compensation from the New Zealand  
47 Accident Compensation Corporation (ACC) in the event of a study related injury or illness. In  
48 the very unlikely event that ACC declines cover, then the University of Otago's clinical trial  
49 insurance would apply. For Australia-based participants, the Baker Institute's clinical trial  
50 insurance will apply in event of study-related injury or illness.  
51

52  
53 Any of the following adverse events (AE) will be documented in a timely manner:  
54

- 55 1. Adverse Device Effects (ADE): adverse events resulting from insufficient or  
56 inadequate instructions for use, deployment, implantation, installation, or operation,  
57 or any malfunction of the investigational medical device, and any event resulting  
58 from use error from intentional misuse of the investigational device.  
59  
60



- 2
  - 3
  - 4
  - 5
  - 6
  - 7
  - 8
  - 9
  - 10
  - 11
  - 12
  - 13
  - 14
  - 15
  - 16
  - 17
  - 18
  - 19
  - 20
  - 21
  - 22
  - 23
  - 24
  - 25
  - 26
  - 27
  - 28
  - 29
  - 30
  - 31
  - 32
  - 33
  - 34
  - 35
  - 36
  - 37
  - 38
  - 39
  - 40
  - 41
  - 42
  - 43
  - 44
  - 45
  - 46
  - 47
  - 48
  - 49
  - 50
  - 51
  - 52
  - 53
  - 54
  - 55
  - 56
  - 57
  - 58
  - 59
  - 60
2. Serious Adverse Events (SAE): adverse events resulting in death, life-threatening illness or injury, causing permanent impairment of body structure or function, requiring hospitalisation, or medical or surgical intervention to prevent any of the aforementioned SAEs.
  3. Device Deficiencies (DD): any inadequacy of a medical device with respect to its identity, quality, durability, reliability, safety, or performance.

An electronic clinical record form (eCRF) will record:

- Start and stop date of the event
- A description of the event, including associated symptoms
- Assessment of seriousness
- Assessment of intensity
- Assessment of relationship to the investigational device
- Intervention/troubleshooting
- Outcome

All reportable AE will be followed up, if possible, until return to baseline status or stability, and if this is not achieved an explanation will be recorded in the eCRF. An independent Data Monitoring Committee (DMC) will assess accumulated data to ensure trial integrity and safety.

Dissemination of study results will be via rigorous peer-reviewed publications, conferences and patient advocacy groups. Investigators envisage trial results can deliver real-world health benefit for the global T1D community. The study is designed to maximise publishable outputs, including the first RCT outcome data for a fully-automated closed loop system in an outpatient setting. To deliver real-world impact investigators will leverage their representation on local and international diabetes advisory groups, and advocate approval of the open-source algorithm by relevant health regulators.

#### **AUTHOR CONTRIBUTIONS**

TMW and DT wrote the manuscript. All authors reviewed the manuscript. TMW, EB, DB, YE, JW, MdB, AJJ, NN and NDC wrote the original study protocol. CK and SM advised regarding conduct of dietary aspects of the protocol.

#### **FUNDING STATEMENT**

The trial is being funded by a grant from the JDRF non-profit diabetes research fund (grant key 2-SRA-2023-1266-M-B). No pharmaceutical or technology companies were involved in the design and development of this trial, nor in the writing and editing of this manuscript.

#### **COMPETING INTERESTS STATEMENT**

TMW, DT, EB, YE, NN have nothing to disclose.

MdB declares receiving speaker fees from Medtronic, Dexcom, Boehringer Ingelheim, research support from Dexcom, Medtronic, Novonordisk, Pfizer, SOOIL, and has served as

1  
2  
3 advisory board membership for Dexcom. NDC declares speaker fees from Novo Nordisk,  
4 Lilly, Boehringer Ingelheim, Abbott and research support from Ypsomed, Novo Nordisk,  
5 Boehringer Ingelheim, Astra Zeneca, Novartis. JW declares research support from Dexcom  
6 and SOOIL. DB declares employment at Nascence Biomed (which provides the technical  
7 platform for the CLOSE IT trial) and serving on an editorial board for Ascensia.  
8  
9

## 10 REFERENCES

- 11 1. Mair C, Wulaningsih W, Jeyam A, McGurnaghan S, Blackburn L, Kennon B, et al.  
12 Glycaemic control trends in people with type 1 diabetes in Scotland 2004–2016.  
13 *Diabetologia*. 2019;62(8):1375–84.
- 14 2. Renard E. Automated insulin delivery systems: from early research to routine care of  
15 type 1 diabetes. *Acta Diabetol*. 2023;60(2):151–61.
- 16 3. Brown SA, Kovatchev BP, Raghinaru D, Lum JW, Buckingham BA, Kudva YC, et al. Six-  
17 Month Randomized, Multicenter Trial of Closed-Loop Control in Type 1 Diabetes. *New*  
18 *England Journal of Medicine*. 2019;381(18):1707–17.
- 19 4. Tauschmann M, Thabit H, Bally L, Allen JM, Hartnell S, Wilinska ME, et al. Closed-loop  
20 insulin delivery in suboptimally controlled type 1 diabetes: a multicentre, 12-week  
21 randomised trial. *Lancet*. 2018;392(10155):1321–9.
- 22 5. Collins OJ, Meier RA, Betts ZL, Chan DSH, Frampton C, Frewen CM, et al. Improved  
23 Glycemic Outcomes With Medtronic MiniMed Advanced Hybrid Closed-Loop Delivery:  
24 Results From a Randomized Crossover Trial Comparing Automated Insulin Delivery With  
25 Predictive Low Glucose Suspend in People With Type 1 Diabetes. *Diabetes Care*.  
26 2021;44(4):969–75.
- 27 6. Benhamou PY, Franc S, Reznik Y, Thivolet C, Schaepelynck P, Renard E, et al. Closed-  
28 loop insulin delivery in adults with type 1 diabetes in real-life conditions: a 12-week  
29 multicentre, open-label randomised controlled crossover trial. *Lancet Digit Health*.  
30 2019;1(1):e17–e25.
- 31 7. Haidar A, Legault L, Raffray M, Gouchie-Provencher N, Jacobs PG, El-Fathi A, et al.  
32 Comparison Between Closed-Loop Insulin Delivery System (the Artificial Pancreas) and  
33 Sensor-Augmented Pump Therapy: A Randomized-Controlled Crossover Trial. *Diabetes*  
34 *Technol Ther*. 2021;23(3):168–74.
- 35 8. Messer LH, Berget C, Vigers T, Pyle L, Geno C, Wadwa RP, et al. Real world hybrid  
36 closed-loop discontinuation: Predictors and perceptions of youth discontinuing the 670G  
37 system in the first 6 months. *Pediatr Diabetes*. 2020;21(2):319–27.
- 38 9. Telo GH, Volkening LK, Butler DA, Laffel LM. Salient characteristics of youth with type  
39 1 diabetes initiating continuous glucose monitoring. *Diabetes Technol Ther*. 2015;17(6):373–  
40 8.
- 41 10. Naranjo D, Suttiratana SC, Iturralde E, Barnard KD, Weissberg-Benchell J, Laffel L, et  
42 al. What End Users and Stakeholders Want From Automated Insulin Delivery Systems.  
43 *Diabetes Care*. 2017;40(11):1453–61.
- 44 11. van Bon AC, Kohinor MJ, Hoekstra JB, von Basum G, deVries JH. Patients' perception  
45 and future acceptance of an artificial pancreas. *J Diabetes Sci Technol*. 2010;4(3):596–602.
- 46 12. Quintal A, Messier V, Rabasa-Lhoret R, Racine E. A Qualitative Study of the Views of  
47 Individuals With Type 1 Diabetes on the Ethical Considerations Raised by the Artificial  
48 Pancreas. *Narrat Inq Bioeth*. 2020;10(3):237–61.
- 49 13. Taleb N, Quintal A, Rakheja R, Messier V, Legault L, Racine E, et al. Perceptions and  
50 expectations of adults with type 1 diabetes for the use of artificial pancreas systems with  
51  
52  
53  
54  
55  
56  
57  
58  
59  
60

- 1  
2  
3 and without glucagon addition: Results of an online survey. *Nutr Metab Cardiovasc Dis*.  
4 2021;31(2):658-65.  
5  
6 14. Tanenbaum ML, Iturralde E, Hanes SJ, Suttiratana SC, Ambrosino JM, Ly TT, et al.  
7 Trust in hybrid closed loop among people with diabetes: Perspectives of experienced system  
8 users. *J Health Psychol*. 2020;25(4):429-38.  
9  
10 15. Olinder AL, Kernell A, Smide B. Missed bolus doses: devastating for metabolic control  
11 in CSII-treated adolescents with type 1 diabetes. *Pediatr Diabetes*. 2009;10(2):142-8.  
12  
13 16. Akturk HK, Snell-Bergeon J, Shah VN. Efficacy and Safety of Tandem Control IQ  
14 Without User-Initiated Boluses in Adults with Uncontrolled Type 1 Diabetes. *Diabetes*  
15 *Technol Ther*. 2022;24(10):779-83.  
16  
17 17. Meade LT, Rushton WE. Accuracy of carbohydrate counting in adults. *Clinical*  
18 *Diabetes: A Publication of the American Diabetes Association*. 2016;34(3):142.  
19  
20 18. Brazeau AS, Mircescu H, Desjardins K, Leroux C, Strychar I, Ekoe JM, et al.  
21 Carbohydrate counting accuracy and blood glucose variability in adults with type 1 diabetes.  
22 *Diabetes Res Clin Pract*. 2013;99(1):19-23.  
23  
24 19. Lewis D. History and Perspective on DIY Closed Looping. *J Diabetes Sci Technol*.  
25 2019;13(4):790-3.  
26  
27 20. Burnside MJ, Lewis DM, Crocket HR, Meier RA, Williman JA, Sanders OJ, et al. Open-  
28 Source Automated Insulin Delivery in Type 1 Diabetes. *N Engl J Med*. 2022;387(10):869-81.  
29  
30 21. Petruzelkova L, Neuman V, Plachy L, Kozak M, Obermannova B, Kolouskova S, et al.  
31 First Use of Open-Source Automated Insulin Delivery AndroidAPS in Full Closed-Loop  
32 Scenario: Pancreas4ALL Randomized Pilot Study. *Diabetes Technol Ther*. 2023;25(5):315-23.  
33  
34 22. Weinzimer SA, Steil GM, Swan KL, Dziura J, Kurtz N, Tamborlane WV. Fully  
35 automated closed-loop insulin delivery versus semiautomated hybrid control in pediatric  
36 patients with type 1 diabetes using an artificial pancreas. *Diabetes Care*. 2008;31(5):934-9.  
37  
38 23. Heise T, Hovelmann U, Brondsted L, Adrian CL, Nosek L, Haahr H. Faster-acting  
39 insulin aspart: earlier onset of appearance and greater early pharmacokinetic and  
40 pharmacodynamic effects than insulin aspart. *Diabetes Obesity & Metabolism*.  
41 2015;17(7):682-8.  
42  
43 24. Heise T, Zijlstra E, Nosek L, Rikte T, Haahr H. Pharmacological properties of faster-  
44 acting insulin aspart vs insulin aspart in patients with type 1 diabetes receiving continuous  
45 subcutaneous insulin infusion: A randomized, double-blind, crossover trial. *Diabetes Obes*  
46 *Metab*. 2017;19(2):208-15.  
47  
48 25. Ozer K, Cooper AM, Ahn LP, Waggoner CR, Blevins TC. Fast Acting Insulin Aspart  
49 Compared with Insulin Aspart in the Medtronic 670G Hybrid Closed Loop System in Type 1  
50 Diabetes: An Open Label Crossover Study. *Diabetes Technol Ther*. 2021;23(4):286-92.  
51  
52 26. Lee MH, Paldus B, Vogrin S, Morrison D, Zaharieva DP, Lu J, et al. Fast-Acting Insulin  
53 Aspart Versus Insulin Aspart Using a Second-Generation Hybrid Closed-Loop System in  
54 Adults With Type 1 Diabetes: A Randomized, Open-Label, Crossover Trial. *Diabetes Care*.  
55 2021;44(10):2371-8.  
56  
57 27. Group BPR, Beck RW, Russell SJ, Damiano ER, El-Khatib FH, Ruedy KJ, et al. A  
58 multicenter randomized trial evaluating fast-acting insulin aspart in the bionic pancreas in  
59 adults with type 1 diabetes. *Diabetes Technology & Therapeutics*. 2022;24(10):681-96.  
60  
28. Nwokolo M, Lakshman R, Boughton CK, Ware J, Allen JM, Wilinska ME, et al. 923-P:  
CamAPS FX Hybrid Closed-Loop with Ultra-Rapid Insulin Lispro Increases Time in Range  
Compared with Standard Insulin Lispro in Adults with Type 1 Diabetes—A Double-Blind,  
Randomized, Crossover Study. *Diabetes*. 2023;72(Supplement\_1).

- 1  
2  
3  
4  
5  
6  
7  
8  
9  
10  
11  
12  
13  
14  
15  
16  
17  
18  
19  
20  
21  
22  
23  
24  
25  
26  
27  
28  
29  
30  
31  
32  
33  
34  
35  
36  
37  
38  
39  
40  
41  
42  
43  
44  
45  
46  
47  
48  
49  
50  
51  
52  
53  
54  
55  
56  
57  
58  
59  
60
29. Dovic K, Piona C, Yesiltepe Mutlu G, Bratina N, Jenko Bizjan B, Lepej D, et al. Faster Compared With Standard Insulin Aspart During Day-and-Night Fully Closed-Loop Insulin Therapy in Type 1 Diabetes: A Double-Blind Randomized Crossover Trial. *Diabetes Care*. 2020;43(1):29-36.
30. Battelino T, Alexander CM, Amiel SA, Arreaza-Rubin G, Beck RW, Bergenstal RM, et al. Continuous glucose monitoring and metrics for clinical trials: an international consensus statement. *Lancet Diabetes Endocrinol*. 2023;11(1):42-57.
31. Weissberg-Benchell J, Shapiro JB, Hood K, Laffel LM, Naranjo D, Miller K, et al. Assessing patient-reported outcomes for automated insulin delivery systems: the psychometric properties of the INSPIRE measures. *Diabet Med*. 2019;36(5):644-52.
32. Devlin NJ, Shah KK, Feng Y, Mulhern B, van Hout B. Valuing health-related quality of life: An EQ-5D-5L value set for England. *Health Econ*. 2018;27(1):7-22.
33. Bangor A, Kortum PT, Miller JT. An empirical evaluation of the System Usability Scale. *Int J Hum-Comput Int*. 2008;24(6):574-94.
34. Mo Y, Lim C, Watson JA, White NJ, Cooper BS. Non-adherence in non-inferiority trials: pitfalls and recommendations. *BMJ*. 2020;370:m2215.
35. Chan AW, Tetzlaff JM, Gøtzsche PC, Altman DG, Mann H, Berlin JA, et al. SPIRIT 2013 explanation and elaboration: guidance for protocols of clinical trials. *BMJ*. 2013;346:e7586.

**TABLES**

**Table 1: Baseline assessments**

|                    |                                                                                                                                                                                                                                                                                                                                                                                                                                                                                                                                                                                                  |
|--------------------|--------------------------------------------------------------------------------------------------------------------------------------------------------------------------------------------------------------------------------------------------------------------------------------------------------------------------------------------------------------------------------------------------------------------------------------------------------------------------------------------------------------------------------------------------------------------------------------------------|
| <b>Demographic</b> | <ul style="list-style-type: none"> <li>• Ethnicity</li> <li>• Gender</li> <li>• Highest level of education attained</li> </ul>                                                                                                                                                                                                                                                                                                                                                                                                                                                                   |
| <b>Auxological</b> | <ul style="list-style-type: none"> <li>• Height</li> <li>• Weight</li> <li>• Body mass index</li> </ul>                                                                                                                                                                                                                                                                                                                                                                                                                                                                                          |
| <b>Diabetic</b>    | <ul style="list-style-type: none"> <li>• Prior or current use of CGM or flash glucose monitoring (&gt;75% use)</li> <li>• Number of episodes of severe hypoglycaemia in the 12 months prior to baseline visit</li> <li>• Number of episodes of diabetic ketoacidosis in the 12 months prior to baseline visit</li> <li>• Mean total daily dose (TDD) of insulin over the previous 14 days</li> <li>• Mode of insulin delivery (i.e. multiple daily injections or insulin pump)</li> <li>• Clinical examination for lipohypertrophy that may impair absorption of subcutaneous insulin</li> </ul> |
| <b>Laboratory</b>  | <ul style="list-style-type: none"> <li>• Venous blood sample obtained for HbA1c, full blood count, and serum creatinine</li> </ul>                                                                                                                                                                                                                                                                                                                                                                                                                                                               |
| <b>Clinical</b>    | <ul style="list-style-type: none"> <li>• Known allergies</li> </ul>                                                                                                                                                                                                                                                                                                                                                                                                                                                                                                                              |

|                     |                                                                                                                                                                                                                                         |
|---------------------|-----------------------------------------------------------------------------------------------------------------------------------------------------------------------------------------------------------------------------------------|
|                     | <ul style="list-style-type: none"><li>• Concomitant medications</li><li>• Adverse event check</li></ul>                                                                                                                                 |
| <b>Diet</b>         | <ul style="list-style-type: none"><li>• Assessment of current carbohydrate intake, recorded over a three-day period</li></ul>                                                                                                           |
| <b>Psychosocial</b> | <ul style="list-style-type: none"><li>• EuroQol 5-dimensional Questionnaire 5-Level (EQ-5D-5L)</li><li>• Insulin Dosing Systems: Perceptions, Ideas, Reflections, and Expectations (INSPIRE) (pre-intervention questionnaire)</li></ul> |
| <b>Blinded CGM</b>  | <ul style="list-style-type: none"><li>• 14 days use of blinded Dexcom G6</li></ul>                                                                                                                                                      |

CGM = continuous glucose monitoring.

**Table 2: oref1 settings**

|                                   |                                                                                                                                                                                                                                           |
|-----------------------------------|-------------------------------------------------------------------------------------------------------------------------------------------------------------------------------------------------------------------------------------------|
| Core settings                     | <ul style="list-style-type: none"><li>• Basal insulin rate</li><li>• Insulin to carbohydrate ratio</li><li>• Insulin sensitivity factor</li><li>• Maximum insulin on board</li><li>• Maximum bolus</li><li>• Maximum basal rate</li></ul> |
| Super micro boluses (SMBs)        | <ul style="list-style-type: none"><li>• Enable SMBs</li><li>• Maximum minutes of basal to form SMBs</li></ul>                                                                                                                             |
| Common settings                   | <ul style="list-style-type: none"><li>• Basal rate multiplier safety ratios</li><li>• Target blood glucose</li><li>• Default temporary targets (e.g. for exercise)</li><li>• Enable unannounced meals (UAM)</li></ul>                     |
| Insulin pharmacokinetic modelling | <ul style="list-style-type: none"><li>• Duration of insulin action</li><li>• Time to peak insulin action</li></ul>                                                                                                                        |
| Other settings                    | <ul style="list-style-type: none"><li>• Default carbohydrate absorption rate</li></ul>                                                                                                                                                    |

**Table 3: Inclusion and exclusion criteria for participation in “CLOSE IT”**

| Inclusion criteria                                                                                                                                                                                                                                                              | Exclusion criteria                                                                                                                                                                                                                                                                                                                                                                                                                                                                                                                                                                                                                                                                                                                                                                                                                                                                                                                                                        |
|---------------------------------------------------------------------------------------------------------------------------------------------------------------------------------------------------------------------------------------------------------------------------------|---------------------------------------------------------------------------------------------------------------------------------------------------------------------------------------------------------------------------------------------------------------------------------------------------------------------------------------------------------------------------------------------------------------------------------------------------------------------------------------------------------------------------------------------------------------------------------------------------------------------------------------------------------------------------------------------------------------------------------------------------------------------------------------------------------------------------------------------------------------------------------------------------------------------------------------------------------------------------|
| <ul style="list-style-type: none"> <li>• Type 1 diabetes as per the American Diabetes Association classification for &gt;12 months prior to the screening visit.</li> <li>• Aged 18-70 years inclusive.</li> <li>• Willing and able to adhere to the study protocol.</li> </ul> | <ul style="list-style-type: none"> <li>• If female, is pregnant or plans to become pregnant while participating in the study. A positive pregnancy test at screening is exclusionary.</li> <li>• Use of non-insulin glucose lowering therapy within 3 months of study commencement.</li> <li>• Severe renal impairment (eGFR &lt;30mL/min/1.73m<sup>2</sup>).</li> <li>• Any documented active or suspected malignancy, except appropriately treated basal cell or squamous cell carcinoma of the skin or any “in situ” carcinoma.</li> <li>• Acute cardiovascular event (myocardial infarction, unstable angina, stroke) in the 3 months prior to study commencement.</li> <li>• Severe hypoglycaemia<sup>a</sup> or diabetic ketoacidosis in the 3 months prior to study commencement.</li> <li>• Consumption of a very low carbohydrate diet, defined as carbohydrate intake &lt;40g per day.</li> <li>• Inability to use insulin pump and/or mobile phone.</li> </ul> |



1  
2  
3  
4  
5  
6  
7  
8  
9  
10  
11  
12  
13  
14  
15  
16  
17  
18  
19  
20  
21  
22  
23  
24  
25  
26  
27  
28  
29  
30  
31  
32  
33  
34  
35  
36  
37  
38  
39  
40  
41  
42  
43  
44  
45  
46

|  |                                                                                                                                                                                                                                                                                                                                                                      |
|--|----------------------------------------------------------------------------------------------------------------------------------------------------------------------------------------------------------------------------------------------------------------------------------------------------------------------------------------------------------------------|
|  | <ul style="list-style-type: none"> <li>• Any comorbid medical or psychological factors that would, on assessment by the investigators, make the person unsuitable for the study.</li> <li>• A lack of English literacy that would, on assessment by the investigators, make the person unsuitable for the study.</li> <li>• Allergy to insulin NovoRapid®</li> </ul> |
|--|----------------------------------------------------------------------------------------------------------------------------------------------------------------------------------------------------------------------------------------------------------------------------------------------------------------------------------------------------------------------|

<sup>a</sup>Defined as coma or convulsion requiring assistance from others.

For Peer review only

**Table 4: Schedule of assessments**

|                                                                       | Screening, consent, and baseline | Day -14 | Staged run-in phase (day 1-84)<br>Establishment of hybrid AID with AAPS using SMBs | RCT phase (day 85-168)<br>Group A: fully-automated AID with AAPS using SMBs<br>Group B: hybrid AID with AAPS using SMBs |            |            | Extension study (n = 20) (day 169-196)<br>Fully-automated AID with ultra-fast insulin |            |
|-----------------------------------------------------------------------|----------------------------------|---------|------------------------------------------------------------------------------------|-------------------------------------------------------------------------------------------------------------------------|------------|------------|---------------------------------------------------------------------------------------|------------|
|                                                                       |                                  |         | Day 1-84                                                                           | Day 85 ±4                                                                                                               | Day 85-168 | Day 168 ±4 |                                                                                       | Day 196 ±4 |
| Screening and informed consent                                        | X                                |         |                                                                                    |                                                                                                                         |            |            |                                                                                       |            |
| Demographics <sup>a</sup>                                             | X                                |         |                                                                                    |                                                                                                                         |            |            |                                                                                       |            |
| Clinical assessment <sup>b</sup>                                      | X                                |         |                                                                                    | X                                                                                                                       |            |            | X                                                                                     | X          |
| HbA1c                                                                 | X                                |         |                                                                                    | X                                                                                                                       |            |            | X                                                                                     |            |
| 1,5 anhydroglucitol and blood biomarkers for storage (Australia only) | x                                |         |                                                                                    | x                                                                                                                       |            |            | x                                                                                     | x          |
| Renal function and full blood count                                   | X                                |         |                                                                                    |                                                                                                                         |            |            |                                                                                       |            |
| Height/weight                                                         | X                                |         |                                                                                    | X                                                                                                                       |            |            | X                                                                                     | X          |
| Pregnancy test <sup>c</sup>                                           | X                                |         |                                                                                    |                                                                                                                         |            |            |                                                                                       |            |
| Carbohydrate counting education                                       |                                  | X       |                                                                                    |                                                                                                                         |            |            |                                                                                       |            |
| Dietary assessment <sup>d</sup>                                       | X                                |         |                                                                                    | X                                                                                                                       |            |            | X                                                                                     | X          |
| Insulin pump training                                                 |                                  | X       |                                                                                    |                                                                                                                         |            |            |                                                                                       |            |
| Blinded CGM <sup>e</sup>                                              |                                  | X       |                                                                                    |                                                                                                                         |            |            |                                                                                       |            |
| Randomisation                                                         |                                  |         |                                                                                    | X                                                                                                                       |            |            |                                                                                       |            |
| INSPIRE and EQ-5D questionnaires                                      | X                                |         |                                                                                    | X <sup>f</sup>                                                                                                          |            |            | X <sup>f</sup>                                                                        |            |
| SUS Questionnaire                                                     |                                  |         |                                                                                    |                                                                                                                         |            |            | X                                                                                     |            |
| Qualitative interview <sup>g</sup>                                    |                                  |         |                                                                                    |                                                                                                                         |            |            | X                                                                                     |            |
| Weekly review of CGM data and pump settings                           |                                  |         | ←→                                                                                 |                                                                                                                         | ←→         |            |                                                                                       | ←→         |
| AE collection                                                         |                                  |         | ←→                                                                                 |                                                                                                                         |            |            |                                                                                       |            |
| Concomitant medication check                                          |                                  |         | ←→                                                                                 |                                                                                                                         |            |            |                                                                                       |            |
| Pump and sensor glucose data                                          |                                  |         | ←→                                                                                 |                                                                                                                         |            |            |                                                                                       |            |

<sup>a</sup>Age, gender, ethnicity, highest level of education, length of time with diabetes, usual mode of insulin delivery. <sup>b</sup>Includes review of current diabetes management. <sup>c</sup>Pregnancy test for females of childbearing potential only (all post-menarchal and pre-menopausal women). <sup>d</sup>Dietary assessment: daily carbohydrate intake during 3 separate days, recorded using Easy Diet Diary. <sup>e</sup>Blinded CGM: 14 days blinded CGM using Dexcom G6 system while continuing usual diabetes management. >75% blinded CGM capture is required before proceeding to run-in phase. <sup>f</sup>Post-intervention questionnaire. <sup>g</sup>Qualitative interview in up to 15 participants in the fully automated closed loop arm (Group A).

1  
2  
3  
4  
5  
6  
7  
8  
9  
10  
11  
12  
13  
14  
15  
16  
17  
18  
19  
20  
21  
22  
23  
24  
25  
26  
27  
28  
29  
30  
31  
32  
33  
34  
35  
36  
37  
38  
39  
40  
41  
42  
43  
44  
45  
46

Figure 1 caption: Study flow diagram

For peer review only

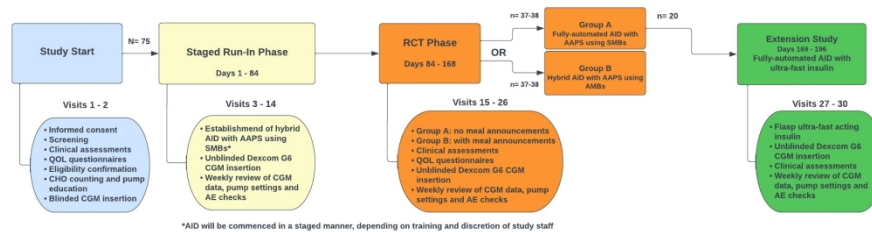

Study flow diagram

345x95mm (160 x 160 DPI)

# Reporting checklist for protocol of a clinical trial.

Based on the SPIRIT guidelines.

## Instructions to authors

Complete this checklist by entering the page numbers from your manuscript where readers will find each of the items listed below.

Your article may not currently address all the items on the checklist. Please modify your text to include the missing information. If you are certain that an item does not apply, please write "n/a" and provide a short explanation.

Upload your completed checklist as an extra file when you submit to a journal.

In your methods section, say that you used the SPIRIT reporting guidelines, and cite them as:

Chan A-W, Tetzlaff JM, Gøtzsche PC, Altman DG, Mann H, Berlin J, Dickersin K, Hróbjartsson A, Schulz KF, Parulekar WR, Krleža-Jerić K, Laupacis A, Moher D. SPIRIT 2013 Explanation and Elaboration: Guidance for protocols of clinical trials. *BMJ*. 2013;346:e7586

|                                   |                    |                                                                                                              | Page   |
|-----------------------------------|--------------------|--------------------------------------------------------------------------------------------------------------|--------|
|                                   |                    | Reporting Item                                                                                               | Number |
| <b>Administrative information</b> |                    |                                                                                                              |        |
| Title                             | <a href="#">#1</a> | Descriptive title identifying the study design, population, interventions, and, if applicable, trial acronym | 1      |

|                                                                                                                            |                                                                  |                     |                                                                                                                                                                                                                                                                                          |                         |
|----------------------------------------------------------------------------------------------------------------------------|------------------------------------------------------------------|---------------------|------------------------------------------------------------------------------------------------------------------------------------------------------------------------------------------------------------------------------------------------------------------------------------------|-------------------------|
| 1<br>2<br>3<br>4<br>5                                                                                                      | Trial registration                                               | <a href="#">#2a</a> | Trial identifier and registry name. If not yet registered, name of intended registry                                                                                                                                                                                                     | 2                       |
| 6<br>7<br>8<br>9<br>10                                                                                                     | Trial registration:<br>data set                                  | <a href="#">#2b</a> | All items from the World Health Organization Trial Registration Data Set                                                                                                                                                                                                                 | 2                       |
| 11<br>12<br>13<br>14<br>15<br>16                                                                                           | Protocol version                                                 | <a href="#">#3</a>  | Date and version identifier                                                                                                                                                                                                                                                              | Available on<br>request |
| 17<br>18<br>19<br>20<br>21<br>22                                                                                           | Funding                                                          | <a href="#">#4</a>  | Sources and types of financial, material, and other support                                                                                                                                                                                                                              | 13                      |
| 23<br>24<br>25<br>26<br>27<br>28<br>29                                                                                     | Roles and<br>responsibilities:<br>contributorship                | <a href="#">#5a</a> | Names, affiliations, and roles of protocol contributors                                                                                                                                                                                                                                  | 13                      |
| 30<br>31<br>32<br>33<br>34<br>35<br>36<br>37<br>38<br>39                                                                   | Roles and<br>responsibilities:<br>sponsor contact<br>information | <a href="#">#5b</a> | Name and contact information for the trial sponsor                                                                                                                                                                                                                                       | 13                      |
| 40<br>41<br>42<br>43<br>44<br>45<br>46<br>47<br>48<br>49<br>50<br>51<br>52<br>53<br>54<br>55<br>56<br>57<br>58<br>59<br>60 | Roles and<br>responsibilities:<br>sponsor and funder             | <a href="#">#5c</a> | Role of study sponsor and funders, if any, in study design; collection, management, analysis, and interpretation of data; writing of the report; and the decision to submit the report for publication, including whether they will have ultimate authority over any of these activities | n/a                     |

1 Roles and [#5d](#) Composition, roles, and responsibilities of the Available on  
 2  
 3 responsibilities: coordinating centre, steering committee, endpoint request  
 4  
 5 committees adjudication committee, data management team, and  
 6  
 7 other individuals or groups overseeing the trial, if  
 8  
 9 applicable (see Item 21a for data monitoring  
 10  
 11 committee)  
 12  
 13  
 14  
 15

## 16 Introduction

17  
 18  
 19 Background and [#6a](#) Description of research question and justification for 4  
 20  
 21 rationale undertaking the trial, including summary of relevant  
 22  
 23 studies (published and unpublished) examining  
 24  
 25 benefits and harms for each intervention  
 26  
 27

28  
 29 Background and [#6b](#) Explanation for choice of comparators 4  
 30  
 31 rationale: choice of  
 32  
 33 comparators  
 34  
 35

36 Objectives [#7](#) Specific objectives or hypotheses 5  
 37  
 38

39 Trial design [#8](#) Description of trial design including type of trial (eg, 5  
 40  
 41 parallel group, crossover, factorial, single group),  
 42  
 43 allocation ratio, and framework (eg, superiority,  
 44  
 45 equivalence, non-inferiority, exploratory)  
 46  
 47  
 48

## 49 Methods:

50  
 51 Participants,  
 52  
 53 interventions, and  
 54  
 55 outcomes  
 56  
 57  
 58  
 59  
 60

|    |                      |                      |                                                        |      |
|----|----------------------|----------------------|--------------------------------------------------------|------|
| 1  | Study setting        | <a href="#">#9</a>   | Description of study settings (eg, community clinic,   | 7    |
| 2  |                      |                      | academic hospital) and list of countries where data    |      |
| 3  |                      |                      | will be collected. Reference to where list of study    |      |
| 4  |                      |                      | sites can be obtained                                  |      |
| 5  |                      |                      |                                                        |      |
| 6  |                      |                      |                                                        |      |
| 7  |                      |                      |                                                        |      |
| 8  |                      |                      |                                                        |      |
| 9  |                      |                      |                                                        |      |
| 10 |                      |                      |                                                        |      |
| 11 | Eligibility criteria | <a href="#">#10</a>  | Inclusion and exclusion criteria for participants. If  | 7    |
| 12 |                      |                      | applicable, eligibility criteria for study centres and |      |
| 13 |                      |                      | individuals who will perform the interventions (eg,    |      |
| 14 |                      |                      | surgeons, psychotherapists)                            |      |
| 15 |                      |                      |                                                        |      |
| 16 |                      |                      |                                                        |      |
| 17 |                      |                      |                                                        |      |
| 18 |                      |                      |                                                        |      |
| 19 |                      |                      |                                                        |      |
| 20 |                      |                      |                                                        |      |
| 21 | Interventions:       | <a href="#">#11a</a> | Interventions for each group with sufficient detail to | 5    |
| 22 |                      |                      | allow replication, including how and when they will be |      |
| 23 | description          |                      | administered                                           |      |
| 24 |                      |                      |                                                        |      |
| 25 |                      |                      |                                                        |      |
| 26 |                      |                      |                                                        |      |
| 27 |                      |                      |                                                        |      |
| 28 |                      |                      |                                                        |      |
| 29 | Interventions:       | <a href="#">#11b</a> | Criteria for discontinuing or modifying allocated      | n/a  |
| 30 |                      |                      | interventions for a given trial participant (eg, drug  |      |
| 31 | modifications        |                      | dose change in response to harms, participant          |      |
| 32 |                      |                      | request, or improving / worsening disease)             |      |
| 33 |                      |                      |                                                        |      |
| 34 |                      |                      |                                                        |      |
| 35 |                      |                      |                                                        |      |
| 36 |                      |                      |                                                        |      |
| 37 |                      |                      |                                                        |      |
| 38 |                      |                      |                                                        |      |
| 39 | Interventions:       | <a href="#">#11c</a> | Strategies to improve adherence to intervention        | 9-10 |
| 40 |                      |                      | protocols, and any procedures for monitoring           |      |
| 41 | adherence            |                      | adherence (eg, drug tablet return; laboratory tests)   |      |
| 42 |                      |                      |                                                        |      |
| 43 |                      |                      |                                                        |      |
| 44 |                      |                      |                                                        |      |
| 45 |                      |                      |                                                        |      |
| 46 | Interventions:       | <a href="#">#11d</a> | Relevant concomitant care and interventions that are   | n/a  |
| 47 |                      |                      | permitted or prohibited during the trial               |      |
| 48 | concomitant care     |                      |                                                        |      |
| 49 |                      |                      |                                                        |      |
| 50 |                      |                      |                                                        |      |
| 51 | Outcomes             | <a href="#">#12</a>  | Primary, secondary, and other outcomes, including      | 8-10 |
| 52 |                      |                      | the specific measurement variable (eg, systolic blood  |      |
| 53 |                      |                      | pressure), analysis metric (eg, change from baseline,  |      |
| 54 |                      |                      |                                                        |      |
| 55 |                      |                      |                                                        |      |
| 56 |                      |                      |                                                        |      |
| 57 |                      |                      |                                                        |      |
| 58 |                      |                      |                                                        |      |
| 59 |                      |                      |                                                        |      |
| 60 |                      |                      |                                                        |      |



1 final value, time to event), method of aggregation (eg,  
 2 median, proportion), and time point for each  
 3 outcome. Explanation of the clinical relevance of  
 4 chosen efficacy and harm outcomes is strongly  
 5 recommended

6  
 7  
 8  
 9  
 10  
 11  
 12  
 13 Participant timeline [#13](#) Time schedule of enrolment, interventions (including Table 3  
 14 any run-ins and washouts), assessments, and visits  
 15 for participants. A schematic diagram is highly  
 16 recommended (see Figure)

17  
 18  
 19  
 20  
 21  
 22 Sample size [#14](#) Estimated number of participants needed to achieve 7  
 23 study objectives and how it was determined,  
 24 including clinical and statistical assumptions  
 25 supporting any sample size calculations

26  
 27  
 28  
 29  
 30  
 31  
 32 Recruitment [#15](#) Strategies for achieving adequate participant 7  
 33 enrolment to reach target sample size

### 34 35 36 37 38 **Methods:**

### 39 40 **Assignment of** 41 **interventions (for** 42 **controlled trials)**

43  
 44  
 45  
 46  
 47  
 48 Allocation: sequence [#16a](#) Method of generating the allocation sequence (eg, 8  
 49 generation computer-generated random numbers), and list of  
 50 any factors for stratification. To reduce predictability  
 51 of a random sequence, details of any planned  
 52 restriction (eg, blocking) should be provided in a  
 53  
 54  
 55  
 56  
 57  
 58  
 59  
 60

|    |                        |                                                                            |      |
|----|------------------------|----------------------------------------------------------------------------|------|
| 1  |                        | separate document that is unavailable to those who                         |      |
| 2  |                        |                                                                            |      |
| 3  |                        | enrol participants or assign interventions                                 |      |
| 4  |                        |                                                                            |      |
| 5  |                        |                                                                            |      |
| 6  | Allocation             | <a href="#">#16b</a> Mechanism of implementing the allocation sequence     | 8    |
| 7  |                        |                                                                            |      |
| 8  | concealment            | (eg, central telephone; sequentially numbered,                             |      |
| 9  |                        |                                                                            |      |
| 10 | mechanism              | opaque, sealed envelopes), describing any steps to                         |      |
| 11 |                        |                                                                            |      |
| 12 |                        | conceal the sequence until interventions are                               |      |
| 13 |                        |                                                                            |      |
| 14 |                        | assigned                                                                   |      |
| 15 |                        |                                                                            |      |
| 16 |                        |                                                                            |      |
| 17 |                        |                                                                            |      |
| 18 | Allocation:            | <a href="#">#16c</a> Who will generate the allocation sequence, who will   | 8    |
| 19 |                        |                                                                            |      |
| 20 | implementation         | enrol participants, and who will assign participants to                    |      |
| 21 |                        |                                                                            |      |
| 22 |                        | interventions                                                              |      |
| 23 |                        |                                                                            |      |
| 24 |                        |                                                                            |      |
| 25 | Blinding (masking)     | <a href="#">#17a</a> Who will be blinded after assignment to interventions | 10   |
| 26 |                        |                                                                            |      |
| 27 |                        | (eg, trial participants, care providers, outcome                           |      |
| 28 |                        |                                                                            |      |
| 29 |                        | assessors, data analysts), and how                                         |      |
| 30 |                        |                                                                            |      |
| 31 |                        |                                                                            |      |
| 32 |                        |                                                                            |      |
| 33 | Blinding (masking):    | <a href="#">#17b</a> If blinded, circumstances under which unblinding is   | n/a  |
| 34 |                        |                                                                            |      |
| 35 | emergency              | permissible, and procedure for revealing a                                 |      |
| 36 |                        |                                                                            |      |
| 37 | unblinding             | participant's allocated intervention during the trial                      |      |
| 38 |                        |                                                                            |      |
| 39 |                        |                                                                            |      |
| 40 |                        |                                                                            |      |
| 41 | <b>Methods: Data</b>   |                                                                            |      |
| 42 |                        |                                                                            |      |
| 43 | <b>collection,</b>     |                                                                            |      |
| 44 |                        |                                                                            |      |
| 45 | <b>management, and</b> |                                                                            |      |
| 46 |                        |                                                                            |      |
| 47 | <b>analysis</b>        |                                                                            |      |
| 48 |                        |                                                                            |      |
| 49 |                        |                                                                            |      |
| 50 |                        |                                                                            |      |
| 51 | Data collection plan   | <a href="#">#18a</a> Plans for assessment and collection of outcome,       | 9-10 |
| 52 |                        |                                                                            |      |
| 53 |                        | baseline, and other trial data, including any related                      |      |
| 54 |                        |                                                                            |      |
| 55 |                        | processes to promote data quality (eg, duplicate                           |      |
| 56 |                        |                                                                            |      |
| 57 |                        | measurements, training of assessors) and a                                 |      |
| 58 |                        |                                                                            |      |
| 59 |                        |                                                                            |      |
| 60 |                        |                                                                            |      |

|    |                        |                                                                             |       |
|----|------------------------|-----------------------------------------------------------------------------|-------|
| 1  |                        | description of study instruments (eg, questionnaires,                       |       |
| 2  |                        | laboratory tests) along with their reliability and                          |       |
| 3  |                        | validity, if known. Reference to where data collection                      |       |
| 4  |                        | forms can be found, if not in the protocol                                  |       |
| 5  |                        |                                                                             |       |
| 6  |                        |                                                                             |       |
| 7  |                        |                                                                             |       |
| 8  |                        |                                                                             |       |
| 9  |                        |                                                                             |       |
| 10 | Data collection plan:  | <a href="#">#18b</a> Plans to promote participant retention and complete    | 10-11 |
| 11 | retention              | follow-up, including list of any outcome data to be                         |       |
| 12 |                        | collected for participants who discontinue or deviate                       |       |
| 13 |                        | from intervention protocols                                                 |       |
| 14 |                        |                                                                             |       |
| 15 |                        |                                                                             |       |
| 16 |                        |                                                                             |       |
| 17 |                        |                                                                             |       |
| 18 |                        |                                                                             |       |
| 19 |                        |                                                                             |       |
| 20 | Data management        | <a href="#">#19</a> Plans for data entry, coding, security, and storage,    | 11    |
| 21 |                        | including any related processes to promote data                             |       |
| 22 |                        | quality (eg, double data entry; range checks for data                       |       |
| 23 |                        | values). Reference to where details of data                                 |       |
| 24 |                        | management procedures can be found, if not in the                           |       |
| 25 |                        | protocol                                                                    |       |
| 26 |                        |                                                                             |       |
| 27 |                        |                                                                             |       |
| 28 |                        |                                                                             |       |
| 29 |                        |                                                                             |       |
| 30 |                        |                                                                             |       |
| 31 |                        |                                                                             |       |
| 32 |                        |                                                                             |       |
| 33 |                        |                                                                             |       |
| 34 | Statistics: outcomes   | <a href="#">#20a</a> Statistical methods for analysing primary and          | 10-11 |
| 35 |                        | secondary outcomes. Reference to where other                                |       |
| 36 |                        | details of the statistical analysis plan can be found, if                   |       |
| 37 |                        | not in the protocol                                                         |       |
| 38 |                        |                                                                             |       |
| 39 |                        |                                                                             |       |
| 40 |                        |                                                                             |       |
| 41 |                        |                                                                             |       |
| 42 |                        |                                                                             |       |
| 43 |                        |                                                                             |       |
| 44 | Statistics: additional | <a href="#">#20b</a> Methods for any additional analyses (eg, subgroup      | 10-11 |
| 45 | analyses               | and adjusted analyses)                                                      |       |
| 46 |                        |                                                                             |       |
| 47 |                        |                                                                             |       |
| 48 |                        |                                                                             |       |
| 49 |                        |                                                                             |       |
| 50 | Statistics: analysis   | <a href="#">#20c</a> Definition of analysis population relating to protocol | 10-11 |
| 51 | population and         | non-adherence (eg, as randomised analysis), and                             |       |
| 52 | missing data           | any statistical methods to handle missing data (eg,                         |       |
| 53 |                        | multiple imputation)                                                        |       |
| 54 |                        |                                                                             |       |
| 55 |                        |                                                                             |       |
| 56 |                        |                                                                             |       |
| 57 |                        |                                                                             |       |
| 58 |                        |                                                                             |       |
| 59 |                        |                                                                             |       |
| 60 |                        |                                                                             |       |

1 **Methods: Monitoring**

2

3

4 Data monitoring: [#21a](#) Composition of data monitoring committee (DMC); 13

5 formal committee

6 summary of its role and reporting structure; statement

7 of whether it is independent from the sponsor and

8 competing interests; and reference to where further

9 details about its charter can be found, if not in the

10 protocol. Alternatively, an explanation of why a DMC

11 is not needed

12

13

14

15

16

17

18

19

20

21 Data monitoring: [#21b](#) Description of any interim analyses and stopping n/a

22 interim analysis

23 guidelines, including who will have access to these

24 interim results and make the final decision to

25 terminate the trial

26

27

28

29

30

31 Harms [#22](#) Plans for collecting, assessing, reporting, and 12-13

32 managing solicited and spontaneously reported

33 adverse events and other unintended effects of trial

34 interventions or trial conduct

35

36

37

38

39

40

41 Auditing [#23](#) Frequency and procedures for auditing trial conduct, n/a

42 if any, and whether the process will be independent

43 from investigators and the sponsor

44

45

46

47

48 **Ethics and**

49 **dissemination**

50

51

52

53

54 Research ethics [#24](#) Plans for seeking research ethics committee / 12

55 approval

56 institutional review board (REC / IRB) approval

57

58

59

60

|    |                    |                      |                                                         |              |
|----|--------------------|----------------------|---------------------------------------------------------|--------------|
| 1  | Protocol           | <a href="#">#25</a>  | Plans for communicating important protocol              | Available on |
| 2  |                    |                      |                                                         |              |
| 3  | amendments         |                      | modifications (eg, changes to eligibility criteria,     | request      |
| 4  |                    |                      |                                                         |              |
| 5  |                    |                      | outcomes, analyses) to relevant parties (eg,            |              |
| 6  |                    |                      |                                                         |              |
| 7  |                    |                      | investigators, REC / IRBs, trial participants, trial    |              |
| 8  |                    |                      |                                                         |              |
| 9  |                    |                      | registries, journals, regulators)                       |              |
| 10 |                    |                      |                                                         |              |
| 11 |                    |                      |                                                         |              |
| 12 |                    |                      |                                                         |              |
| 13 | Consent or assent  | <a href="#">#26a</a> | Who will obtain informed consent or assent from         | 12           |
| 14 |                    |                      |                                                         |              |
| 15 |                    |                      | potential trial participants or authorised surrogates,  |              |
| 16 |                    |                      |                                                         |              |
| 17 |                    |                      | and how (see Item 32)                                   |              |
| 18 |                    |                      |                                                         |              |
| 19 |                    |                      |                                                         |              |
| 20 |                    |                      |                                                         |              |
| 21 | Consent or assent: | <a href="#">#26b</a> | Additional consent provisions for collection and use    | 12           |
| 22 |                    |                      |                                                         |              |
| 23 | ancillary studies  |                      | of participant data and biological specimens in         |              |
| 24 |                    |                      |                                                         |              |
| 25 |                    |                      | ancillary studies, if applicable                        |              |
| 26 |                    |                      |                                                         |              |
| 27 |                    |                      |                                                         |              |
| 28 | Confidentiality    | <a href="#">#27</a>  | How personal information about potential and            | 11           |
| 29 |                    |                      |                                                         |              |
| 30 |                    |                      | enrolled participants will be collected, shared, and    |              |
| 31 |                    |                      |                                                         |              |
| 32 |                    |                      | maintained in order to protect confidentiality before,  |              |
| 33 |                    |                      |                                                         |              |
| 34 |                    |                      | during, and after the trial                             |              |
| 35 |                    |                      |                                                         |              |
| 36 |                    |                      |                                                         |              |
| 37 |                    |                      |                                                         |              |
| 38 | Declaration of     | <a href="#">#28</a>  | Financial and other competing interests for principal   | 13           |
| 39 |                    |                      |                                                         |              |
| 40 | interests          |                      | investigators for the overall trial and each study site |              |
| 41 |                    |                      |                                                         |              |
| 42 |                    |                      |                                                         |              |
| 43 |                    |                      |                                                         |              |
| 44 | Data access        | <a href="#">#29</a>  | Statement of who will have access to the final trial    | No access    |
| 45 |                    |                      |                                                         |              |
| 46 |                    |                      | dataset, and disclosure of contractual agreements       | planned      |
| 47 |                    |                      |                                                         |              |
| 48 |                    |                      | that limit such access for investigators                | outside of   |
| 49 |                    |                      |                                                         |              |
| 50 |                    |                      |                                                         |              |
| 51 |                    |                      |                                                         | named        |
| 52 |                    |                      |                                                         |              |
| 53 |                    |                      |                                                         | authors      |
| 54 |                    |                      |                                                         |              |
| 55 |                    |                      |                                                         |              |
| 56 |                    |                      |                                                         |              |
| 57 |                    |                      |                                                         |              |
| 58 |                    |                      |                                                         |              |
| 59 |                    |                      |                                                         |              |
| 60 |                    |                      |                                                         |              |

|                                                                                      |                                                   |                      |                                                                                                                                                                                                                                                                                                    |                         |
|--------------------------------------------------------------------------------------|---------------------------------------------------|----------------------|----------------------------------------------------------------------------------------------------------------------------------------------------------------------------------------------------------------------------------------------------------------------------------------------------|-------------------------|
| 1<br>2<br>3<br>4<br>5<br>6<br>7                                                      | Ancillary and post<br>trial care                  | <a href="#">#30</a>  | Provisions, if any, for ancillary and post-trial care, and<br>for compensation to those who suffer harm from trial<br>participation                                                                                                                                                                | 12                      |
| 8<br>9<br>10<br>11<br>12<br>13<br>14<br>15<br>16<br>17<br>18<br>19<br>20<br>21<br>22 | Dissemination<br>policy: trial results            | <a href="#">#31a</a> | Plans for investigators and sponsor to communicate<br>trial results to participants, healthcare professionals,<br>the public, and other relevant groups (eg, via<br>publication, reporting in results databases, or other<br>data sharing arrangements), including any publication<br>restrictions | 13                      |
| 23<br>24<br>25<br>26<br>27                                                           | Dissemination<br>policy: authorship               | <a href="#">#31b</a> | Authorship eligibility guidelines and any intended use<br>of professional writers                                                                                                                                                                                                                  | n/a                     |
| 28<br>29<br>30<br>31<br>32<br>33<br>34<br>35                                         | Dissemination<br>policy: reproducible<br>research | <a href="#">#31c</a> | Plans, if any, for granting public access to the full<br>protocol, participant-level dataset, and statistical code                                                                                                                                                                                 | n/a                     |
| 36<br>37<br>38                                                                       | <b>Appendices</b>                                 |                      |                                                                                                                                                                                                                                                                                                    |                         |
| 39<br>40<br>41<br>42<br>43<br>44                                                     | Informed consent<br>materials                     | <a href="#">#32</a>  | Model consent form and other related documentation<br>given to participants and authorised surrogates                                                                                                                                                                                              | Available on<br>request |
| 45<br>46<br>47<br>48<br>49<br>50<br>51<br>52<br>53                                   | Biological<br>specimens                           | <a href="#">#33</a>  | Plans for collection, laboratory evaluation, and<br>storage of biological specimens for genetic or<br>molecular analysis in the current trial and for future<br>use in ancillary studies, if applicable                                                                                            | 10                      |

None The SPIRIT Explanation and Elaboration paper is distributed under the terms of the Creative Commons Attribution License CC-BY-NC. This checklist can be completed online using

1 <https://www.goodreports.org/>, a tool made by the [EQUATOR Network](#) in collaboration with  
2  
3 [Penelope.ai](#)  
4  
5  
6  
7  
8  
9  
10  
11  
12  
13  
14  
15  
16  
17  
18  
19  
20  
21  
22  
23  
24  
25  
26  
27  
28  
29  
30  
31  
32  
33  
34  
35  
36  
37  
38  
39  
40  
41  
42  
43  
44  
45  
46  
47  
48  
49  
50  
51  
52  
53  
54  
55  
56  
57  
58  
59  
60

For peer review only
